# Supplementary material for: Use of molecular electrostatic potential for quantitative assessment of inductive effect
Source: Royal Society of Chemistry journal article supplement (doi:10.1039/b809561b), 2008-01-01
Supplement: b809561b.pdf [file b809561b.pdf]

## Supporting Information

### **Use of Molecular Electrostatic potential for Quantitative Assessment of Inductive Effect**

**Cherumuttathu H. Suresh,<sup>a\*</sup> P. Alexander,<sup>a</sup> Periya S. Vijayalakshmi,<sup>a</sup>**

**Shridhar R. Gadre<sup>b</sup>**

*<sup>a</sup>Computational Modeling and Simulation Section, National Institute for Interdisciplinary Science and Technology (CSIR), Trivandrum 695 019*

*<sup>b</sup>Department of Chemistry, University of Pune, Pune 411007*

*E-mail: sureshch@gmail.com*

#### **Contents**

1. Table S1. Total energy of 4-substituted bicyclooctane carboxylic acids, 4-substituted bicyclooctane carboxylates, and 4-substituted bicyclooctane quinuclidines at B3LYP/6-31G(d,p) level. (Page S2)
2. Table S2. Cartesian coordinates of the optimized geometries of 4-substituted bicyclooctane carboxylic acids at B3LYP/6-31G(d,p) level (Pages S2, S13)
3. Table S3. Cartesian coordinates of the optimized geometries of 4-substituted bicyclooctane carboxylates at B3LYP/6-31G(d,p) level (Pages S13, S23)
4. Table S4. Cartesian coordinates of the optimized geometries of 4-substituted 4-substituted Quinuclidines at B3LYP/6-31G(d,p) level. (Pages S23, S32)
5. Table S5. Comparison of  $V_{\min}$  values at three different levels of theory. (Pages 33)

**1. Table S1. Total energy of 4-substituted bicyclooctane carboxylic acids, 4-substituted bicyclooctane carboxylates, and 4-substituted quinuclidines at B3LYP/6-31G(d,p) level.**

| Substituents                      | Model (i), 4-substituted Bicyclooctane carboxylic acids | Model (ii), 4-substituted Bicyclooctane carboxylates | Model (iii), 4-substituted quinuclidines |
|-----------------------------------|---------------------------------------------------------|------------------------------------------------------|------------------------------------------|
|                                   | SCF Energy (in a.u.)                                    | SCF Energy (in a.u.)                                 | SCF Energy (in a.u.)                     |
| NO <sub>2</sub>                   | -706.381959388                                          | -705.818042366                                       | -533.830675856                           |
| CN                                | -594.118885134                                          | -593.554349182                                       | -421.567277157                           |
| Cl                                | -961.479971177                                          | -960.911871323                                       | -788.928278234                           |
| Br                                | -3072.99071096                                          | -3072.42302568                                       | -2900.43879082                           |
| CF <sub>3</sub>                   | -838.920990850                                          | -838.351132059                                       | -666.369405551                           |
| F                                 | -601.118041329                                          | -600.546163546                                       | -428.565960500                           |
| CHO                               | -615.196060493                                          | -614.625764911                                       | -442.644595515                           |
| CH <sub>2</sub> Cl                | -1000.79161546                                          | -1000.21937613                                       | -828.240302029                           |
| COOH                              | -690.450760428                                          | -689.877878103                                       | -517.899187013                           |
| COCH <sub>3</sub>                 | -654.521040827                                          | -653.948733426                                       | -481.969794172                           |
| CONH <sub>2</sub>                 | -670.581877248                                          | -670.008553573                                       | -498.029765033                           |
| OH                                | -577.098158315                                          | -576.523191572                                       | -404.546409316                           |
| OCH <sub>3</sub>                  | -616.399898607                                          | -615.824445279                                       | -443.848206919                           |
| C <sub>6</sub> H <sub>5</sub>     | -732.933609032                                          | -732.358593415                                       | -560.382243678                           |
| NH <sub>2</sub>                   | -557.231979610                                          | -556.655086348                                       | -384.680150292                           |
| H                                 | -501.880559166                                          | -501.301710829                                       | -329.328291955                           |
| CH <sub>3</sub>                   | -541.199206457                                          | -540.621147692                                       | -368.647438177                           |
| CH <sub>2</sub> CH <sub>3</sub>   | -580.512452957                                          | -579.934315084                                       | -407.960834158                           |
| CH(CH <sub>3</sub> ) <sub>2</sub> | -619.825025707                                          | -619.246978958                                       | -447.273138422                           |
| C(CH <sub>3</sub> ) <sub>3</sub>  | -659.136732534                                          | -658.558546842                                       | -486.583709125                           |

**2. Table S2. Cartesian coordinates of the optimized geometries of 4-substituted bicyclooctane carboxylic acids at B3LYP/6-31G(d,p) level**

| Substituents    | Atomic number followed by Cartesian coordinates in Angstrom unit |              |              |              |
|-----------------|------------------------------------------------------------------|--------------|--------------|--------------|
| NO <sub>2</sub> | 6                                                                | 1.282624579  | 0.052689650  | -0.029056064 |
|                 | 6                                                                | 0.773309998  | -1.185840706 | -0.815238299 |
|                 | 6                                                                | 0.714151156  | 1.329911858  | -0.680366364 |
|                 | 6                                                                | -0.839632841 | 1.274351951  | -0.703229996 |
|                 | 6                                                                | -0.782858472 | -1.242070551 | -0.784935493 |
|                 | 6                                                                | -1.304708733 | -0.024107199 | -0.017561276 |
|                 | 6                                                                | 0.759129635  | -0.046500392 | 1.428351526  |
|                 | 6                                                                | -0.796159871 | -0.051805394 | 1.435892831  |
|                 | 7                                                                | -2.831948670 | -0.021893650 | 0.018248148  |

|    |    |              |              |              |
|----|----|--------------|--------------|--------------|
|    | 8  | -3.433333742 | -0.926594655 | -0.553536865 |
|    | 8  | -3.369059344 | 0.901564042  | 0.626731075  |
|    | 6  | 2.802445980  | 0.096542039  | -0.040116927 |
|    | 8  | 3.483163189  | 0.990517150  | -0.493619713 |
|    | 8  | 3.351736198  | -1.006388763 | 0.530975393  |
|    | 1  | 1.201429209  | -2.092775897 | -0.381590243 |
|    | 1  | 1.131364025  | -1.127958769 | -1.848682836 |
|    | 1  | 1.116371375  | 1.431204321  | -1.691595511 |
|    | 1  | 1.064168568  | 2.204431767  | -0.124850376 |
|    | 1  | -1.216464722 | 1.291469776  | -1.731334077 |
|    | 1  | -1.279603506 | 2.127519558  | -0.182503708 |
|    | 1  | -1.134651803 | -2.157553013 | -0.302665573 |
|    | 1  | -1.197455088 | -1.243279721 | -1.795631759 |
|    | 1  | 1.137827925  | 0.800617131  | 2.009995641  |
|    | 1  | 1.152983561  | -0.953630320 | 1.893208868  |
|    | 1  | -1.198051471 | 0.813133761  | 1.967686862  |
|    | 1  | -1.178915363 | -0.947415663 | 1.936432066  |
|    | 1  | 4.314784815  | -0.884323447 | 0.476955392  |
| CN | 6  | -0.458097632 | -0.692309365 | 1.255956691  |
|    | 6  | 1.096322436  | -0.715894795 | 1.266888964  |
|    | 6  | 1.643058845  | -0.005714585 | -0.000111656 |
|    | 6  | 1.095830831  | -0.732197159 | -1.257657996 |
|    | 6  | -0.458017726 | -0.683533490 | -1.260786492 |
|    | 6  | -0.972477497 | 0.060257413  | 0.000189975  |
|    | 6  | -0.408929128 | 1.494976529  | 0.005163712  |
|    | 6  | 1.143704967  | 1.464031302  | -0.009595042 |
|    | 6  | 3.110854185  | -0.040353469 | -0.000062443 |
|    | 7  | 4.272091324  | -0.068185018 | 0.000076202  |
|    | 6  | -2.492827547 | 0.102079350  | 0.000025930  |
|    | 8  | -3.175138637 | 1.103462096  | 0.000021167  |
|    | 8  | -3.041247268 | -1.140444706 | -0.000105835 |
|    | 1  | -0.837871210 | -0.196522672 | 2.155760160  |
|    | 1  | -0.861564063 | -1.708087850 | 1.259109000  |
|    | 1  | 1.489830281  | -0.214487181 | 2.156249120  |
|    | 1  | 1.470159175  | -1.744048089 | 1.291996837  |
|    | 1  | 1.504384772  | -0.255848204 | -2.153875760 |
|    | 1  | 1.453576347  | -1.766445517 | -1.257932110 |
|    | 1  | -0.877421388 | -1.692560201 | -1.282583832 |
|    | 1  | -0.821757233 | -0.168451406 | -2.156449678 |
|    | 1  | -0.797739995 | 2.037969538  | -0.860599902 |
|    | 1  | -0.781423873 | 2.024664434  | 0.886376655  |
|    | 1  | 1.538767005  | 1.969144745  | -0.896398213 |
|    | 1  | 1.555405396  | 1.987523600  | 0.858702272  |
|    | 1  | -4.004430296 | -1.007741869 | -0.000285227 |
| CI | 6  | -1.075698812 | 0.061526910  | -0.000319623 |
|    | 6  | -0.558868326 | -0.684552156 | 1.259675749  |
|    | 6  | -0.558722802 | -0.689280355 | -1.257338902 |
|    | 6  | 0.999971430  | -0.720665328 | -1.254181302 |
|    | 6  | 0.999812148  | -0.715951417 | 1.256842005  |
|    | 6  | 1.514785751  | -0.003279311 | 0.000022225  |
|    | 6  | -0.509860163 | 1.496206867  | -0.002900421 |
|    | 6  | 1.047193091  | 1.457346206  | -0.002780297 |
|    | 17 | 3.354922903  | -0.047735492 | 0.000237601  |
|    | 6  | -2.595409086 | 0.102713304  | 0.000030163  |

|                 |    |              |              |              |
|-----------------|----|--------------|--------------|--------------|
|                 | 8  | -3.279402431 | 1.103220791  | 0.000227546  |
|                 | 8  | -3.144293425 | -1.140181705 | 0.000102660  |
|                 | 1  | -0.928892342 | -0.178273465 | 2.157716529  |
|                 | 1  | -0.967515931 | -1.698119738 | 1.274477366  |
|                 | 1  | -0.967345536 | -1.702901383 | -1.268402940 |
|                 | 1  | -0.928586478 | -0.186451370 | -2.157384734 |
|                 | 1  | 1.403925234  | -0.229376112 | -2.143840443 |
|                 | 1  | 1.369316512  | -1.750215121 | -1.259926579 |
|                 | 1  | 1.403631011  | -0.221299280 | 2.144702472  |
|                 | 1  | 1.369154584  | -1.745466284 | 1.266509015  |
|                 | 1  | -0.888023983 | 2.032257599  | -0.877761120 |
|                 | 1  | -0.888142519 | 2.035436896  | 0.869932472  |
|                 | 1  | 1.453151947  | 1.968299649  | 0.875078720  |
|                 | 1  | 1.453178406  | 1.964866876  | -0.882617909 |
|                 | 1  | -4.107194401 | -1.005956425 | 0.000539761  |
| Br              | 6  | 1.634109928  | 0.061432187  | -0.000830808 |
|                 | 6  | 1.113183611  | -0.689473505 | -1.256654676 |
|                 | 6  | 1.075819993  | 1.499606301  | -0.006252758 |
|                 | 6  | -0.482708078 | 1.469054782  | -0.005406075 |
|                 | 6  | -0.446965859 | -0.711532787 | -1.253589152 |
|                 | 6  | -0.950165268 | 0.010751294  | -0.000113244 |
|                 | 6  | 1.113528635  | -0.679565190 | 1.261228355  |
|                 | 6  | -0.446574268 | -0.702641022 | 1.258284013  |
|                 | 35 | -2.953376327 | -0.028186097 | 0.000379420  |
|                 | 6  | 3.153971018  | 0.094552862  | -0.000056622 |
|                 | 8  | 3.843287886  | 1.091414847  | 0.000856738  |
|                 | 8  | 3.696284034  | -1.151201292 | 0.000452976  |
|                 | 1  | 1.515372608  | -1.705718194 | -1.265126804 |
|                 | 1  | 1.485908019  | -0.190894872 | -2.157916028 |
|                 | 1  | 1.456076710  | 2.031710430  | -0.882668710 |
|                 | 1  | 1.457035579  | 2.038716736  | 0.865400598  |
|                 | 1  | -0.886108891 | 1.978066673  | -0.885388681 |
|                 | 1  | -0.885347405 | 1.984282919  | 0.871305157  |
|                 | 1  | -0.822316044 | -1.738727212 | -1.259054495 |
|                 | 1  | -0.847659930 | -0.219813879 | -2.144342632 |
|                 | 1  | 1.485993216  | -0.173222997 | 2.158257348  |
|                 | 1  | 1.516411383  | -1.695438926 | 1.278005920  |
|                 | 1  | -0.847533986 | -0.205075234 | 2.145670338  |
|                 | 1  | -0.821322250 | -1.729985204 | 1.270719678  |
|                 | 1  | 4.659885641  | -1.022201638 | 0.001728293  |
| CF <sub>3</sub> | 6  | -1.049669641 | -0.726832360 | 1.229584614  |
|                 | 6  | 0.497421851  | -0.610015424 | 1.309273416  |
|                 | 6  | 1.042500348  | 0.007178819  | 0.000791120  |
|                 | 6  | 0.535441649  | 1.464011723  | -0.110981169 |
|                 | 6  | -1.007630213 | 1.496871513  | 0.053688736  |
|                 | 6  | -1.572730659 | 0.063557892  | 0.000339732  |
|                 | 6  | -1.046938557 | -0.634613699 | -1.282727239 |
|                 | 6  | 0.494776494  | -0.803082568 | -1.196775095 |
|                 | 6  | 2.563443605  | -0.023100704 | 0.000058739  |
|                 | 9  | 3.080803797  | 0.558089906  | -1.109101538 |
|                 | 9  | 3.044553567  | -1.289467899 | 0.040882118  |
|                 | 9  | 3.084496925  | 0.629819882  | 1.066434505  |
|                 | 6  | -3.091830263 | 0.097631086  | -0.000816520 |
|                 | 8  | -3.781944072 | 1.094071316  | -0.001136144 |

|     |   |              |              |              |
|-----|---|--------------|--------------|--------------|
|     | 8 | -3.634114703 | -1.148483967 | -0.000238659 |
|     | 1 | -1.507392086 | -0.334719956 | 2.144119319  |
|     | 1 | -1.361132257 | -1.771597586 | 1.144657486  |
|     | 1 | 0.949527080  | -1.593188123 | 1.470366612  |
|     | 1 | 0.797025076  | 0.018464053  | 2.153399501  |
|     | 1 | 1.019875374  | 2.080818607  | 0.651647915  |
|     | 1 | 0.833679068  | 1.871071796  | -1.081990729 |
|     | 1 | -1.290678127 | 1.956966260  | 1.005566951  |
|     | 1 | -1.472962756 | 2.103943124  | -0.726945075 |
|     | 1 | -1.535097690 | -1.604987188 | -1.402811316 |
|     | 1 | -1.320690944 | -0.029194180 | -2.154066264 |
|     | 1 | 0.764342031  | -1.856113543 | -1.070357826 |
|     | 1 | 0.972251009  | -0.462633739 | -2.120211620 |
|     | 1 | -4.597676093 | -1.019143522 | -0.000936115 |
| F   | 6 | 0.739181240  | 0.062202140  | -0.000297927 |
|     | 6 | 0.228221976  | -0.692859181 | -1.259771001 |
|     | 6 | 0.228457460  | -0.689356027 | 1.261450080  |
|     | 6 | -1.327419962 | -0.729206778 | 1.253890783  |
|     | 6 | -1.327623166 | -0.734060921 | -1.251018938 |
|     | 6 | -1.845861792 | -0.022022770 | 0.000103719  |
|     | 6 | 0.163092428  | 1.494817776  | -0.002168568 |
|     | 6 | -1.391037122 | 1.438329692  | -0.002781885 |
|     | 9 | -3.246892955 | -0.065919610 | 0.000313273  |
|     | 6 | 2.258096161  | 0.113975254  | -0.000090489 |
|     | 8 | 2.936427838  | 1.118629903  | 0.000153991  |
|     | 8 | 2.816645393  | -1.125110208 | 0.000060855  |
|     | 1 | 0.647566371  | -1.702080629 | -1.271826717 |
|     | 1 | 0.595937722  | -0.185984107 | -2.158472723 |
|     | 1 | 0.597283419  | -0.180675930 | 2.158667460  |
|     | 1 | 0.646936650  | -1.698918266 | 1.275539954  |
|     | 1 | -1.742810344 | -0.234570516 | 2.137597739  |
|     | 1 | -1.697306921 | -1.759612251 | 1.258505209  |
|     | 1 | -1.696611583 | -1.764809830 | -1.251000946 |
|     | 1 | -1.744033802 | -0.243572350 | -2.136545205 |
|     | 1 | 0.539216800  | 2.035573953  | 0.870652682  |
|     | 1 | 0.539941243  | 2.033657273  | -0.875869311 |
|     | 1 | -1.808373818 | 1.936920496  | -0.883628108 |
|     | 1 | -1.809231614 | 1.940709406  | 0.875494654  |
|     | 1 | 3.778286928  | -0.982438730 | 0.000456151  |
| CHO | 6 | -0.511098437 | 1.503927563  | -0.146093667 |
|     | 6 | 1.042796158  | 1.518760930  | -0.123885157 |
|     | 6 | 1.586537952  | 0.085474826  | 0.116282996  |
|     | 6 | 0.995560738  | -0.435701792 | 1.451713643  |
|     | 6 | -0.555506463 | -0.513462801 | 1.354969988  |
|     | 6 | -1.028793599 | 0.058471440  | -0.006306734 |
|     | 6 | -0.421190165 | -0.811430868 | -1.142136486 |
|     | 6 | 1.129326163  | -0.828860379 | -1.031628401 |
|     | 6 | 3.094819585  | 0.143849427  | 0.232523129  |
|     | 8 | 3.877271120  | -0.436162706 | -0.488333761 |
|     | 6 | -2.546082887 | 0.041013354  | -0.088676878 |
|     | 8 | -3.260029781 | 1.000393185  | -0.288361912 |
|     | 8 | -3.057016221 | -1.205435610 | 0.086828991  |
|     | 1 | -0.922460722 | 2.112862407  | 0.664596353  |
|     | 1 | -0.892973378 | 1.936622041  | -1.074556847 |

|                    |    |              |              |              |
|--------------------|----|--------------|--------------|--------------|
|                    | 1  | 1.411624763  | 2.190176261  | 0.660474062  |
|                    | 1  | 1.438441349  | 1.897666128  | -1.072608946 |
|                    | 1  | 1.412950881  | -1.424008569 | 1.674212568  |
|                    | 1  | 1.299419606  | 0.226375677  | 2.270920772  |
|                    | 1  | -0.899311334 | -1.546244280 | 1.453063045  |
|                    | 1  | -1.018805907 | 0.053846960  | 2.170061705  |
|                    | 1  | -0.735047837 | -0.402775855 | -2.109228546 |
|                    | 1  | -0.829313355 | -1.823727895 | -1.079753368 |
|                    | 1  | 1.498931071  | -1.843509070 | -0.853123156 |
|                    | 1  | 1.594922766  | -0.498099198 | -1.964688014 |
|                    | 1  | 3.463303166  | 0.788569882  | 1.065943429  |
|                    | 1  | -4.021699466 | -1.110360980 | 0.013043161  |
| CH <sub>2</sub> Cl | 6  | 0.741371505  | -1.265176546 | -0.720103342 |
|                    | 6  | -0.786671723 | -1.014033258 | -0.851428731 |
|                    | 6  | -1.172288476 | 0.347634527  | -0.232652778 |
|                    | 6  | -0.383557724 | 1.455015709  | -0.978498476 |
|                    | 6  | 1.148292934  | 1.215323816  | -0.853232167 |
|                    | 6  | 1.417122914  | -0.067777551 | -0.024476564 |
|                    | 6  | 0.788041234  | 0.120026396  | 1.381284914  |
|                    | 6  | -0.741319116 | 0.367732150  | 1.250004506  |
|                    | 6  | -2.658893422 | 0.659864979  | -0.403957507 |
|                    | 17 | -3.782493358 | -0.530432987 | 0.406943655  |
|                    | 6  | 2.912420125  | -0.310591590 | 0.098609005  |
|                    | 8  | 3.507233345  | -1.299184652 | -0.273217918 |
|                    | 8  | 3.556832599  | 0.728759094  | 0.693208967  |
|                    | 1  | 0.943247334  | -2.174188758 | -0.146339735 |
|                    | 1  | 1.202170586  | -1.418909417 | -1.700281956 |
|                    | 1  | -1.352256367 | -1.808913578 | -0.357048061 |
|                    | 1  | -1.089675441 | -1.026999158 | -1.905518060 |
|                    | 1  | -0.649326414 | 2.435416049  | -0.565538076 |
|                    | 1  | -0.681880869 | 1.467182553  | -2.033319128 |
|                    | 1  | 1.601043759  | 1.106925032  | -1.845020930 |
|                    | 1  | 1.637883491  | 2.066551989  | -0.373113882 |
|                    | 1  | 1.278598598  | 0.955106196  | 1.888583330  |
|                    | 1  | 0.982187371  | -0.774311730 | 1.983654256  |
|                    | 1  | -1.010502587 | 1.335735982  | 1.689809009  |
|                    | 1  | -1.303300592 | -0.391840936 | 1.800464734  |
|                    | 1  | -2.942035530 | 0.653742398  | -1.458555905 |
|                    | 1  | -2.908039596 | 1.632454662  | 0.025504756  |
|                    | 1  | 4.494631524  | 0.474705331  | 0.725461791  |
| COOH               | 6  | -1.309558642 | 0.053047373  | -0.030987032 |
|                    | 6  | -0.775504496 | -0.047394173 | 1.422192961  |
|                    | 6  | -0.815360539 | -1.192925860 | -0.814806490 |
|                    | 6  | 0.727930403  | -1.318000607 | -0.692713128 |
|                    | 6  | 0.775678595  | 0.044631338  | 1.422179732  |
|                    | 6  | 1.309559172  | -0.052858986 | -0.031314593 |
|                    | 6  | -0.728008721 | 1.319491299  | -0.689950293 |
|                    | 6  | 0.815277458  | 1.194676907  | -0.812498219 |
|                    | 6  | 2.827681914  | -0.111898763 | -0.034526699 |
|                    | 8  | 3.505989778  | -0.991046856 | -0.521244882 |
|                    | 8  | 3.386723810  | 0.960088400  | 0.586664949  |
|                    | 6  | -2.827694614 | 0.111807215  | -0.034389642 |
|                    | 8  | -3.506116781 | 0.990783326  | -0.521257053 |
|                    | 8  | -3.386613212 | -0.960310125 | 0.586693524  |

|                   |   |              |              |              |
|-------------------|---|--------------|--------------|--------------|
|                   | 1 | -1.112821654 | -0.989481550 | 1.862877487  |
|                   | 1 | -1.203347477 | 0.757550041  | 2.029903289  |
|                   | 1 | -1.114029766 | -1.092831983 | -1.864620067 |
|                   | 1 | -1.309639077 | -2.088607567 | -0.429471259 |
|                   | 1 | 1.189610035  | -1.463262408 | -1.672789081 |
|                   | 1 | 1.002949111  | -2.192654398 | -0.094707381 |
|                   | 1 | 1.203611536  | -0.761544800 | 2.028192459  |
|                   | 1 | 1.113082009  | 0.985837635  | 1.864693094  |
|                   | 1 | -1.189856103 | 1.466694651  | -1.669648943 |
|                   | 1 | -1.002914714 | 2.192967671  | -0.090154870 |
|                   | 1 | 1.309602035  | 2.089574374  | -0.425428874 |
|                   | 1 | 1.113794811  | 1.096765358  | -1.862566330 |
|                   | 1 | 4.348089114  | 0.827658089  | 0.529075118  |
|                   | 1 | -4.348001800 | -0.828234363 | 0.528678235  |
| COCH <sub>3</sub> | 6 | -0.803857284 | 1.502771839  | -0.149323236 |
|                   | 6 | 0.735278558  | 1.488421082  | -0.342439065 |
|                   | 6 | 1.304903999  | 0.087784155  | -0.028640131 |
|                   | 6 | 0.767970070  | -0.348599217 | 1.364881478  |
|                   | 6 | -0.772605663 | -0.544885346 | 1.307712343  |
|                   | 6 | -1.325980071 | 0.059201176  | -0.009798246 |
|                   | 6 | -0.780190890 | -0.784726468 | -1.192808912 |
|                   | 6 | 0.765288200  | -0.911287674 | -1.082115086 |
|                   | 6 | 2.839316405  | 0.123953420  | 0.023682799  |
|                   | 8 | 3.439877019  | 1.171924932  | 0.180836800  |
|                   | 6 | 3.603830418  | -1.185527433 | -0.103375834 |
|                   | 6 | -2.845165930 | 0.040184133  | -0.003043298 |
|                   | 8 | -3.571967598 | 1.000810706  | -0.136456820 |
|                   | 8 | -3.343646665 | -1.212602258 | 0.176327151  |
|                   | 1 | -1.084125959 | 2.070822449  | 0.744047554  |
|                   | 1 | -1.303842470 | 1.993715503  | -0.988378744 |
|                   | 1 | 0.999785689  | 1.754118333  | -1.372425429 |
|                   | 1 | 1.224892928  | 2.226863061  | 0.295568248  |
|                   | 1 | 1.035145313  | 0.420085772  | 2.097702537  |
|                   | 1 | 1.251148058  | -1.276222063 | 1.690895939  |
|                   | 1 | -1.036864610 | -1.605157583 | 1.356961282  |
|                   | 1 | -1.247128956 | -0.060194970 | 2.167869323  |
|                   | 1 | -1.059657332 | -0.297323529 | -2.133653781 |
|                   | 1 | -1.249883853 | -1.772032041 | -1.193013703 |
|                   | 1 | 1.039034237  | -1.934146549 | -0.802087186 |
|                   | 1 | 1.228132552  | -0.716166263 | -2.056143072 |
|                   | 1 | 3.175069844  | -1.976939526 | 0.518879989  |
|                   | 1 | 3.567563785  | -1.539729579 | -1.140179059 |
|                   | 1 | 4.644898283  | -1.016095461 | 0.174097198  |
|                   | 1 | -4.310996964 | -1.116405242 | 0.165802345  |
| CONH <sub>2</sub> | 6 | -0.758911085 | 1.339479912  | -0.668383145 |
|                   | 6 | 0.786517204  | 1.249111254  | -0.777958291 |
|                   | 6 | 1.313331676  | 0.002974505  | -0.023050432 |
|                   | 6 | 0.761454840  | 0.044723944  | 1.426148561  |
|                   | 6 | -0.787912644 | -0.057985655 | 1.422059609  |
|                   | 6 | -1.316630038 | 0.051105293  | -0.032514238 |
|                   | 6 | -0.793198066 | -1.172073630 | -0.831281895 |
|                   | 6 | 0.756847294  | -1.258837532 | -0.717565937 |
|                   | 6 | 2.845722095  | 0.092481133  | 0.060198675  |
|                   | 8 | 3.395772741  | 1.091295782  | 0.508918227  |

|                  |   |              |              |              |
|------------------|---|--------------|--------------|--------------|
|                  | 7 | 3.566268888  | -0.989015874 | -0.358849380 |
|                  | 6 | -2.835979942 | 0.075414637  | -0.038306612 |
|                  | 8 | -3.533622885 | 0.963391524  | -0.478792166 |
|                  | 8 | -3.372586840 | -1.039171294 | 0.527004447  |
|                  | 1 | -1.060346321 | 2.196718479  | -0.058106837 |
|                  | 1 | -1.217412479 | 1.490928323  | -1.649464536 |
|                  | 1 | 1.096508178  | 1.186605367  | -1.828175630 |
|                  | 1 | 1.269834894  | 2.135134419  | -0.360822682 |
|                  | 1 | 1.195945345  | -0.776323133 | 2.008144050  |
|                  | 1 | 1.100462719  | 0.973334235  | 1.892191260  |
|                  | 1 | -1.122025634 | -1.005195997 | 1.854993804  |
|                  | 1 | -1.225415756 | 0.740335905  | 2.031698788  |
|                  | 1 | -1.261323078 | -2.085200195 | -0.454824670 |
|                  | 1 | -1.095510149 | -1.068820036 | -1.879476719 |
|                  | 1 | 1.035794614  | -2.151548968 | -0.143380576 |
|                  | 1 | 1.194458886  | -1.364472424 | -1.717396606 |
|                  | 1 | 3.146421775  | -1.817552926 | -0.743184466 |
|                  | 1 | 4.571146850  | -0.932142020 | -0.292537650 |
|                  | 1 | -4.336374718 | -0.921184347 | 0.479162061  |
| OH               | 6 | -0.748656688 | 0.061331114  | -0.000234955 |
|                  | 6 | -0.237429661 | -0.688720485 | 1.260689653  |
|                  | 6 | -0.237296308 | -0.692371279 | -1.258844941 |
|                  | 6 | 1.317868313  | -0.724900334 | -1.251659772 |
|                  | 6 | 1.317747131  | -0.720400211 | 1.254262266  |
|                  | 6 | 1.863767563  | -0.012936267 | 0.000054505  |
|                  | 6 | -0.173177488 | 1.492871462  | -0.002223074 |
|                  | 6 | 1.379598955  | 1.442758906  | -0.002576035 |
|                  | 8 | 3.288169310  | 0.025650280  | 0.000065089  |
|                  | 6 | -2.267639873 | 0.110219683  | 0.000030163  |
|                  | 8 | -2.949763105 | 1.112370795  | 0.000157695  |
|                  | 8 | -2.824738630 | -1.130332129 | -0.000009525 |
|                  | 1 | -0.653968886 | -1.699368596 | 1.274292154  |
|                  | 1 | -0.609334373 | -0.181170181 | 2.157595876  |
|                  | 1 | -0.654383761 | -1.702816186 | -1.270011110 |
|                  | 1 | -0.608491923 | -0.186994835 | -2.157276253 |
|                  | 1 | 1.680329857  | -1.761281276 | -1.261700910 |
|                  | 1 | 1.731190670  | -0.235623579 | -2.139343494 |
|                  | 1 | 1.730433417  | -0.227461020 | 2.140220341  |
|                  | 1 | 1.680779128  | -1.756525031 | 1.268464854  |
|                  | 1 | -0.552614509 | 2.030558940  | -0.875897887 |
|                  | 1 | -0.552190638 | 2.032785718  | 0.870251036  |
|                  | 1 | 1.795174549  | 1.945621229  | -0.881770696 |
|                  | 1 | 1.795697377  | 1.948994205  | 0.874429949  |
|                  | 1 | 3.605638617  | -0.887961541 | 0.001754752  |
|                  | 1 | -3.786288617 | -0.987384420 | 0.000297927  |
| OCH <sub>3</sub> | 6 | 0.654328727  | 1.535763395  | 0.028576101  |
|                  | 6 | -0.887404846 | 1.620896902  | -0.117978480 |
|                  | 6 | -1.518518038 | 0.224776503  | 0.008502291  |
|                  | 6 | -1.048544081 | -0.635731851 | -1.181966599 |
|                  | 6 | 0.504314914  | -0.613604833 | -1.270509595 |
|                  | 6 | 1.094872491  | 0.058149700  | -0.000556694 |
|                  | 6 | 0.511745621  | -0.663512069 | 1.245060932  |
|                  | 6 | -1.022231271 | -0.417938899 | 1.320647022  |
|                  | 8 | -2.928973848 | 0.456840836  | 0.014329062  |

|                               |   |              |              |              |
|-------------------------------|---|--------------|--------------|--------------|
|                               | 6 | -3.785068334 | -0.669230358 | -0.020742161 |
|                               | 6 | 2.610628752  | -0.041594390 | -0.006992548 |
|                               | 8 | 3.387767348  | 0.888768007  | -0.022118551 |
|                               | 8 | 3.043287246  | -1.331038476 | 0.008391164  |
|                               | 1 | 1.160787338  | 2.084428125  | -0.769884104 |
|                               | 1 | 0.988887284  | 1.989864680  | 0.966682477  |
|                               | 1 | -1.174292471 | 2.042655403  | -1.087097819 |
|                               | 1 | -1.326159991 | 2.267534566  | 0.648001884  |
|                               | 1 | -1.498774964 | -0.245475801 | -2.100849025 |
|                               | 1 | -1.402443008 | -1.665603912 | -1.063494397 |
|                               | 1 | 0.832512761  | -0.052986518 | -2.153105278 |
|                               | 1 | 0.903347369  | -1.626102418 | -1.371768720 |
|                               | 1 | 1.003902159  | -0.293836780 | 2.151271679  |
|                               | 1 | 0.738298043  | -1.731494947 | 1.178756610  |
|                               | 1 | -1.541518727 | -1.363961768 | 1.504547229  |
|                               | 1 | -1.276035264 | 0.250257975  | 2.150330273  |
|                               | 1 | -3.624433935 | -1.356499839 | 0.821643460  |
|                               | 1 | -4.803776873 | -0.279264826 | 0.047020044  |
|                               | 1 | -3.695909906 | -1.240613197 | -0.954939505 |
|                               | 1 | 4.014217959  | -1.283313038 | 0.003827539  |
| C <sub>6</sub> H <sub>5</sub> | 6 | 2.135547177  | -0.037594868 | -0.049054731 |
|                               | 6 | 1.635805412  | 1.426888351  | -0.132165722 |
|                               | 6 | 1.559170492  | -0.825363576 | -1.240389884 |
|                               | 6 | 0.011169873  | -0.884835161 | -1.137034159 |
|                               | 6 | 0.086437399  | 1.451535840  | -0.251209965 |
|                               | 6 | -0.514070826 | 0.046447475  | -0.007649257 |
|                               | 6 | 1.595827659  | -0.652447502 | 1.268305572  |
|                               | 6 | 0.055170962  | -0.465111347 | 1.344615577  |
|                               | 6 | -2.046326834 | 0.042201886  | 0.008906053  |
|                               | 6 | -2.740598389 | -1.157111144 | 0.246744768  |
|                               | 6 | -4.132882252 | -1.204650311 | 0.256957889  |
|                               | 6 | -4.877467451 | -0.046425249 | 0.026685350  |
|                               | 6 | -4.209033504 | 1.151349462  | -0.214983549 |
|                               | 6 | -2.812391866 | 1.193148644  | -0.224341520 |
|                               | 6 | 3.653624410  | -0.082736863 | -0.074154666 |
|                               | 8 | 4.337405555  | -0.672627147 | -0.883271443 |
|                               | 8 | 4.209238296  | 0.633842159  | 0.939522455  |
|                               | 1 | 2.092878028  | 1.924701265  | -0.994573293 |
|                               | 1 | 1.969655930  | 1.970453400  | 0.756313883  |
|                               | 1 | 1.993518649  | -1.828821226 | -1.258339576 |
|                               | 1 | 1.873443040  | -0.343713323 | -2.171963038 |
|                               | 1 | -0.318395367 | -1.910571174 | -0.941118454 |
|                               | 1 | -0.450980198 | -0.591474641 | -2.085600253 |
|                               | 1 | -0.210073843 | 1.806447083  | -1.244679924 |
|                               | 1 | -0.325228104 | 2.162378580  | 0.473014080  |
|                               | 1 | 2.088008539  | -0.181898329 | 2.123713186  |
|                               | 1 | 1.858224960  | -1.716522935 | 1.296493785  |
|                               | 1 | -0.422277624 | -1.409140805 | 1.621659975  |
|                               | 1 | -0.208812813 | 0.253621426  | 2.128955216  |
|                               | 1 | -2.186475195 | -2.073838760 | 0.425518305  |
|                               | 1 | -4.636736782 | -2.148701465 | 0.444863967  |
|                               | 1 | -5.962961862 | -0.079572912 | 0.034880718  |
|                               | 1 | -4.771729369 | 2.062541354  | -0.398278906 |
|                               | 1 | -2.325929805 | 2.141815811  | -0.419397312 |
|                               | 1 | 5.170826913  | 0.540800627  | 0.831137429  |

|                 |              |              |              |              |
|-----------------|--------------|--------------|--------------|--------------|
| NH <sub>2</sub> | 6            | -0.759273571 | 0.061126852  | 0.000945111  |
|                 | 6            | -0.247839635 | -0.667870373 | 1.272623658  |
|                 | 6            | -0.247523717 | -0.712450910 | -1.244279866 |
|                 | 6            | 1.306628588  | -0.750041016 | -1.241375212 |
|                 | 6            | 1.307026529  | -0.699812040 | 1.261450080  |
|                 | 6            | 1.869790129  | -0.016620928 | -0.008631939 |
|                 | 6            | -0.183658902 | 1.491526294  | -0.024641139 |
|                 | 6            | 1.368678854  | 1.440255368  | -0.038716724 |
|                 | 7            | 3.334012464  | -0.018083045 | -0.086530005 |
|                 | 6            | -2.277935545 | 0.111217712  | 0.000645596  |
|                 | 8            | -2.959599452 | 1.113891650  | -0.014287786 |
|                 | 8            | -2.836907061 | -1.128414391 | 0.020356920  |
|                 | 1            | -0.664091518 | -1.678478795 | 1.302931226  |
|                 | 1            | -0.619976656 | -0.146497430 | 2.161808127  |
|                 | 1            | -0.667684631 | -1.721850162 | -1.240007818 |
|                 | 1            | -0.618719860 | -0.220268972 | -2.150238196 |
|                 | 1            | 1.663453865  | -1.787982501 | -1.235409268 |
|                 | 1            | 1.717864399  | -0.282162601 | -2.140949018 |
|                 | 1            | 1.670902564  | -1.734258310 | 1.299555605  |
|                 | 1            | 1.710941702  | -0.192858119 | 2.146486858  |
|                 | 1            | -0.569208979 | 2.017416294  | -0.902898098 |
|                 | 1            | -0.556555292 | 2.043748154  | 0.842969832  |
|                 | 1            | 1.779355325  | 1.978034394  | 0.825454595  |
|                 | 1            | 1.776113585  | 1.927490029  | -0.930043303 |
|                 | 1            | 3.718076082  | 0.456757755  | 0.729496767  |
|                 | 1            | 3.676313943  | -0.976933170 | -0.038293382 |
|                 | 1            | -3.798181876 | -0.983381724 | 0.018174063  |
|                 | H            | 6            | -0.425535239 | 0.061077638  |
| 6               |              | 0.075736906  | -0.697322791 | 1.260020773  |
| 6               |              | 0.075807287  | -0.697647176 | -1.259875778 |
| 6               |              | 1.631737098  | -0.758962415 | -1.253814582 |
| 6               |              | 1.631714343  | -0.757479131 | 1.254720004  |
| 6               |              | 2.181887229  | -0.054340683 | 0.000043393  |
| 6               |              | 0.165949456  | 1.486165728  | -0.000206379 |
| 6               |              | 1.719992750  | 1.414909366  | -0.000836100 |
| 6               |              | -1.943293378 | 0.129757966  | -0.000028576 |
| 8               |              | -2.612789912 | 1.140924670  | 0.000010054  |
| 8               |              | -2.518264568 | -1.102929744 | -0.000008467 |
| 1               |              | -0.289659984 | -0.184218242 | 2.156904241  |
| 1               |              | -0.358189496 | -1.700958244 | 1.272852262  |
| 1               |              | -0.288761441 | -0.184163737 | -2.156884662 |
| 1               |              | -0.358862610 | -1.700952953 | -1.273042766 |
| 1               |              | 2.037334525  | -0.282186414 | -2.153206351 |
| 1               |              | 1.972007594  | -1.800704452 | -1.271174241 |
| 1               |              | 1.972740504  | -1.798937000 | 1.273859816  |
| 1               |              | 2.036582035  | -0.278989654 | 2.153536028  |
| 1               |              | 3.277262438  | -0.100708251 | 0.000084139  |
| 1               |              | -0.208032806 | 2.029314844  | -0.873220779 |
| 1               |              | -0.207320533 | 2.029165616  | 0.873210725  |
| 1               |              | 2.128039210  | 1.928101758  | -0.879151798 |
| 1               | 2.128803871  | 1.929466506  | 0.876320170  |              |
| 1               | -3.477482471 | -0.945139142 | 0.000049743  |              |
| CH <sub>3</sub> | 6            | -0.771844177 | 0.062413281  | -0.000067206 |

|                                 |   |              |              |              |
|---------------------------------|---|--------------|--------------|--------------|
|                                 | 6 | -0.258233206 | -0.721205089 | 1.237538148  |
|                                 | 6 | -0.255485717 | -0.654951568 | -1.276281331 |
|                                 | 6 | 1.291243289  | -0.795074529 | -1.208765193 |
|                                 | 6 | 1.293978077  | -0.655653787 | 1.288512734  |
|                                 | 6 | 1.864532753  | -0.020508793 | -0.000069322 |
|                                 | 6 | -0.194147724 | 1.491092368  | 0.038418797  |
|                                 | 6 | 1.353365523  | 1.436444763  | -0.081766881 |
|                                 | 6 | 3.394851443  | -0.065961415 | 0.001551548  |
|                                 | 6 | -2.289973798 | 0.111508230  | -0.000406408 |
|                                 | 8 | -2.972924135 | 1.113604836  | 0.000297927  |
|                                 | 8 | -2.848183828 | -1.128867896 | -0.000085727 |
|                                 | 1 | -0.608243738 | -1.755711685 | 1.177015617  |
|                                 | 1 | -0.693670409 | -0.295094105 | 2.148393484  |
|                                 | 1 | -0.554144890 | -0.072550730 | -2.155636862 |
|                                 | 1 | -0.735632048 | -1.632985956 | -1.367200862 |
|                                 | 1 | 1.748271453  | -0.421061045 | -2.132499116 |
|                                 | 1 | 1.577477908  | -1.850869926 | -1.126840088 |
|                                 | 1 | 1.712781652  | -1.660667218 | 1.418639007  |
|                                 | 1 | 1.625214459  | -0.067506612 | 2.152972455  |
|                                 | 1 | -0.636244094 | 2.084394787  | -0.766782067 |
|                                 | 1 | -0.501175835 | 1.973690378  | 0.971817613  |
|                                 | 1 | 1.820300944  | 2.032265536  | 0.711457115  |
|                                 | 1 | 1.682279875  | 1.875635421  | -1.031635810 |
|                                 | 1 | 3.804762195  | 0.454868063  | 0.874514617  |
|                                 | 1 | 3.805793561  | 0.412130650  | -0.894982135 |
|                                 | 1 | 3.760841542  | -1.098865662 | 0.026888025  |
|                                 | 1 | -3.809470285 | -0.984187131 | 0.000199500  |
| CH <sub>2</sub> CH <sub>3</sub> | 6 | -1.118503959 | 0.064686098  | -0.014618522 |
|                                 | 6 | -0.532722207 | -0.466983047 | 1.320403072  |
|                                 | 6 | -0.746426206 | -0.941686261 | -1.135648773 |
|                                 | 6 | 0.785939342  | -1.192474472 | -1.115904641 |
|                                 | 6 | 1.020000260  | -0.443064235 | 1.255591559  |
|                                 | 6 | 1.507330172  | -0.183156713 | -0.189739678 |
|                                 | 6 | -0.469812558 | 1.425640551  | -0.336739297 |
|                                 | 6 | 1.049082254  | 1.235631522  | -0.601795714 |
|                                 | 6 | 3.032752386  | -0.369102719 | -0.331763972 |
|                                 | 6 | 3.923418022  | 0.473992000  | 0.589577011  |
|                                 | 6 | -2.626368071 | 0.210662288  | 0.090284518  |
|                                 | 8 | -3.260410259 | 1.229683570  | -0.083754471 |
|                                 | 8 | -3.237929222 | -0.960077287 | 0.415640154  |
|                                 | 1 | -0.906080570 | -1.480228889 | 1.495707323  |
|                                 | 1 | -0.892420388 | 0.147661620  | 2.153255564  |
|                                 | 1 | -1.061208351 | -0.529223817 | -2.101331634 |
|                                 | 1 | -1.298935938 | -1.874514624 | -0.994316113 |
|                                 | 1 | 1.196161779  | -1.116740211 | -2.129851642 |
|                                 | 1 | 1.002285523  | -2.210758081 | -0.769635391 |
|                                 | 1 | 1.428690729  | -1.394223298 | 1.618227203  |
|                                 | 1 | 1.410816709  | 0.336330772  | 1.918547462  |
|                                 | 1 | -0.970547059 | 1.875444917  | -1.198465817 |
|                                 | 1 | -0.641346421 | 2.108558608  | 0.501950021  |
|                                 | 1 | 1.620624905  | 1.992498925  | -0.054857689 |
|                                 | 1 | 1.275996634  | 1.385939557  | -1.664761462 |
|                                 | 1 | 3.305768158  | -0.162897162 | -1.376083631 |
|                                 | 1 | 3.263844619  | -1.430843951 | -0.167031624 |
|                                 | 1 | 3.767003811  | 1.547729680  | 0.445251325  |

|                                   |   |              |              |              |
|-----------------------------------|---|--------------|--------------|--------------|
|                                   | 1 | 4.979659515  | 0.269726406  | 0.386558159  |
|                                   | 1 | 3.745989653  | 0.251174510  | 1.646357207  |
|                                   | 1 | -4.187722478 | -0.757355833 | 0.457522416  |
| CH(CH <sub>3</sub> ) <sub>2</sub> | 6 | 1.399474853  | 0.062074608  | -0.014201001 |
|                                   | 6 | 0.921962766  | -0.996162942 | -1.042090764 |
|                                   | 6 | 0.767230280  | -0.287833794 | 1.360129466  |
|                                   | 6 | -0.760855282 | -0.513963403 | 1.190156675  |
|                                   | 6 | -0.600636286 | -0.818970586 | -1.286545253 |
|                                   | 6 | -1.248440258 | 0.042781864  | -0.170503556 |
|                                   | 6 | 0.875327434  | 1.440318341  | -0.458942728 |
|                                   | 6 | -0.670078629 | 1.473926388  | -0.323846422 |
|                                   | 6 | -2.803255092 | 0.043047511  | -0.310350285 |
|                                   | 6 | -3.452846624 | -1.320119433 | -0.008169438 |
|                                   | 6 | -3.505570141 | 1.128246112  | 0.526560468  |
|                                   | 6 | 2.914449520  | 0.070741473  | 0.079050614  |
|                                   | 8 | 3.638530687  | 1.024031003  | -0.114880147 |
|                                   | 8 | 3.417817207  | -1.148491905 | 0.411881937  |
|                                   | 1 | 1.148023583  | -1.996204753 | -0.659697230 |
|                                   | 1 | 1.476873376  | -0.886139583 | -1.980562273 |
|                                   | 1 | 0.963325377  | 0.534778590  | 2.057974026  |
|                                   | 1 | 1.246836321  | -1.178060742 | 1.776142690  |
|                                   | 1 | -1.300753662 | -0.037463103 | 2.015717635  |
|                                   | 1 | -0.987769132 | -1.584104795 | 1.247022063  |
|                                   | 1 | -0.778278972 | -0.330977085 | -2.252920807 |
|                                   | 1 | -1.077228663 | -1.801995115 | -1.344318708 |
|                                   | 1 | 1.342486697  | 2.225904721  | 0.140880742  |
|                                   | 1 | 1.186252935  | 1.622829457  | -1.493266758 |
|                                   | 1 | -0.952305261 | 2.076052308  | 0.546042657  |
|                                   | 1 | -1.116712165 | 1.963154988  | -1.198057292 |
|                                   | 1 | -3.005974429 | 0.274519165  | -1.367430525 |
|                                   | 1 | -4.519407603 | -1.291241172 | -0.254591408 |
|                                   | 1 | -3.008983860 | -2.138849772 | -0.581441440 |
|                                   | 1 | -3.372293146 | -1.574502345 | 1.054295709  |
|                                   | 1 | -3.199109837 | 2.138440189  | 0.243949124  |
|                                   | 1 | -3.309127904 | 1.005045711  | 1.597762860  |
|                                   | 1 | -4.590107271 | 1.065451294  | 0.388127170  |
|                                   | 1 | 4.382890456  | -1.035468111 | 0.440873441  |
| C(CH <sub>3</sub> ) <sub>3</sub>  | 6 | 1.631420121  | 0.064622596  | -0.008529808 |
|                                   | 6 | 1.097614158  | -0.690051895 | 1.237137561  |
|                                   | 6 | 1.054698412  | 1.491971861  | 0.007447641  |
|                                   | 6 | -0.471148730 | 1.434415898  | -0.267482695 |
|                                   | 6 | -0.432684424 | -0.458985591 | 1.354941942  |
|                                   | 6 | -1.031264856 | 0.008205422  | -0.001007024 |
|                                   | 6 | 1.090827989  | -0.664313772 | -1.265449073 |
|                                   | 6 | -0.430806373 | -0.917981766 | -1.095285778 |
|                                   | 6 | -2.613118531 | -0.023042494 | 0.003232744  |
|                                   | 6 | -3.184693991 | 0.643573199  | 1.275742629  |
|                                   | 6 | -3.192126814 | 0.727734078  | -1.217814654 |
|                                   | 6 | -3.146440297 | -1.473713129 | -0.043263944 |
|                                   | 6 | 3.148421007  | 0.096814565  | -0.001117622 |
|                                   | 8 | 3.843487386  | 1.090580334  | 0.009790308  |
|                                   | 8 | 3.691098097  | -1.150616551 | 0.004069902  |
|                                   | 1 | 1.605471914  | -0.335884146 | 2.141224720  |
|                                   | 1 | 1.333157831  | -1.754536912 | 1.141117291  |

|   |              |              |              |
|---|--------------|--------------|--------------|
| 1 | 1.565489398  | 2.109122182  | -0.736650715 |
| 1 | 1.264028761  | 1.952033799  | 0.979376910  |
| 1 | -0.668602225 | 1.710793004  | -1.308503992 |
| 1 | -0.985351321 | 2.176918783  | 0.351147735  |
| 1 | -0.631591568 | 0.300218129  | 2.117958913  |
| 1 | -0.916969450 | -1.379033265 | 1.697975801  |
| 1 | 1.286710885  | -0.042440545 | -2.147004923 |
| 1 | 1.624415401  | -1.606773690 | -1.415290903 |
| 1 | -0.937647051 | -0.767714478 | -2.053771300 |
| 1 | -0.598211596 | -1.963429102 | -0.816324170 |
| 1 | -2.941829151 | 0.078331991  | 2.180145706  |
| 1 | -4.276902603 | 0.695367481  | 1.208358785  |
| 1 | -2.819080667 | 1.666426783  | 1.409806510  |
| 1 | -4.280766656 | 0.608326290  | -1.244225361 |
| 1 | -2.983173240 | 1.800517652  | -1.176818234 |
| 1 | -2.801036781 | 0.344788082  | -2.165824582 |
| 1 | -2.745694895 | -2.090355969 | 0.767649389  |
| 1 | -2.910298124 | -1.968428768 | -0.989824986 |
| 1 | -4.237015339 | -1.471267801 | 0.059458885  |
| 1 | 4.654022886  | -1.018180949 | 0.017821631  |

**3. Table S3. Cartesian coordinates of the optimized geometries of 4-substituted bicyclooctane carboxylates at B3LYP/6-31G(d,p) level**

| Substituents    | Atomic number followed by Cartesian coordinates in Angstrom unit |              |              |              |
|-----------------|------------------------------------------------------------------|--------------|--------------|--------------|
| NO <sub>2</sub> | 6                                                                | -1.337797657 | 0.045672759  | 0.000079906  |
|                 | 6                                                                | -0.790520429 | 1.481409483  | -0.000198441 |
|                 | 6                                                                | -0.792986925 | -0.684353715 | 1.245980642  |
|                 | 6                                                                | 0.765264916  | -0.703979311 | 1.257262172  |
|                 | 6                                                                | 0.770626011  | 1.484703612  | -0.001315005 |
|                 | 6                                                                | 1.267882759  | 0.033994876  | -0.000266176 |
|                 | 6                                                                | -0.793202829 | -0.684776527 | -1.245671073 |
|                 | 6                                                                | 0.765027315  | -0.705931975 | -1.256426601 |
|                 | 7                                                                | 2.797263747  | -0.019214955 | -0.000028576 |
|                 | 8                                                                | 3.434350292  | 1.034436745  | 0.001109685  |
|                 | 8                                                                | 3.325808100  | -1.133226199 | -0.000839804 |
|                 | 6                                                                | -2.920099016 | -0.023457898 | 0.000097369  |
|                 | 8                                                                | -3.519861631 | 1.077490077  | -0.000802762 |
|                 | 8                                                                | -3.375942882 | -1.195647419 | 0.000995382  |
|                 | 1                                                                | -1.183935138 | 2.012025565  | 0.871234248  |
|                 | 1                                                                | -1.185359684 | 2.012221361  | -0.870837365 |
|                 | 1                                                                | -1.208344497 | -1.695236251 | 1.248065071  |
|                 | 1                                                                | -1.166981358 | -0.183792255 | 2.146912317  |
|                 | 1                                                                | 1.165371071  | -1.722187777 | 1.249425586  |
|                 | 1                                                                | 1.168775269  | -0.204796358 | 2.147353121  |
|                 | 1                                                                | 1.176731449  | 2.003270327  | 0.873483780  |
|                 | 1                                                                | 1.175476769  | 2.001418736  | -0.877849492 |
|                 | 1                                                                | -1.209504454 | -1.695277527 | -1.247959235 |
|                 | 1                                                                | -1.166450064 | -0.183750979 | -2.146662016 |
|                 | 1                                                                | 1.169277458  | -0.208995379 | -2.147441494 |
|                 | 1                                                                | 1.164100517  | -1.724507690 | -1.246478068 |

|    |    |              |              |              |
|----|----|--------------|--------------|--------------|
| CN | 6  | -0.469160611 | 1.474309512  | -0.000513302 |
|    | 6  | 1.088344560  | 1.465268519  | -0.001511330 |
|    | 6  | 1.607849507  | -0.001779623 | -0.000060326 |
|    | 6  | 1.066571033  | -0.732951237 | -1.260019185 |
|    | 6  | -0.489294218 | -0.693237542 | -1.246130399 |
|    | 6  | -1.024750684 | 0.042134151  | -0.000065618 |
|    | 6  | -0.489288926 | -0.692384509 | 1.246524107  |
|    | 6  | 1.066616542  | -0.730472570 | 1.261343186  |
|    | 6  | 3.076905348  | -0.015460972 | -0.000034397 |
|    | 7  | 4.240348626  | -0.025442313 | 0.000237601  |
|    | 6  | -2.608440605 | -0.010508402 | 0.000045509  |
|    | 8  | -3.196658159 | 1.096867489  | 0.000112715  |
|    | 8  | -3.077371553 | -1.177414616 | 0.000064030  |
|    | 1  | -0.861434414 | 2.006518417  | -0.871724266 |
|    | 1  | -0.860306737 | 2.006594619  | 0.871163867  |
|    | 1  | 1.496944540  | 1.981847116  | 0.875768768  |
|    | 1  | 1.495776116  | 1.979554720  | -0.880682178 |
|    | 1  | 1.446213375  | -1.762182994 | -1.259459845 |
|    | 1  | 1.476571216  | -0.248804326 | -2.154594383 |
|    | 1  | -0.920705441 | -1.697533409 | -1.248904875 |
|    | 1  | -0.858826629 | -0.186797981 | -2.146148185 |
|    | 1  | -0.859875458 | -0.186132276 | 2.146201102  |
|    | 1  | -0.919621686 | -1.697144464 | 1.249317633  |
|    | 1  | 1.475626634  | -0.243645377 | 2.154921414  |
|    | 1  | 1.447323060  | -1.759302682 | 1.263593248  |
| Cl | 6  | -1.132664213 | 0.042395564  | -0.000358782 |
|    | 6  | -0.574258388 | 1.474729679  | -0.003195701 |
|    | 6  | -0.593662259 | -0.690367814 | 1.247654959  |
|    | 6  | 0.968205449  | -0.722567721 | 1.255195734  |
|    | 6  | 0.989291046  | 1.457384307  | -0.002716796 |
|    | 6  | 1.464576355  | 0.000080964  | 0.000033338  |
|    | 6  | -0.593473872 | -0.695389706 | -1.245254611 |
|    | 6  | 0.968424529  | -0.727307032 | -1.252492168 |
|    | 17 | 3.344193835  | -0.019018101 | 0.000244480  |
|    | 6  | -2.715286254 | -0.010826967 | 0.000000000  |
|    | 8  | -3.304807172 | 1.096311324  | 0.000355607  |
|    | 8  | -3.184723625 | -1.177899343 | 0.000209025  |
|    | 1  | -0.962023601 | 2.007208465  | -0.876193697 |
|    | 1  | -0.962725290 | 2.010892067  | 0.867201388  |
|    | 1  | -1.019429807 | -1.696975127 | 1.252982186  |
|    | 1  | -0.961992379 | -0.184444201 | 2.148377079  |
|    | 1  | 1.352917309  | -1.748931866 | 1.254282904  |
|    | 1  | 1.379573555  | -0.228469102 | 2.142594230  |
|    | 1  | 1.399482791  | 1.968226093  | 0.876071457  |
|    | 1  | 1.399959579  | 1.965061084  | -0.883111631 |
|    | 1  | -1.019142464 | -1.702041999 | -1.246515640 |
|    | 1  | -0.961733082 | -0.193279344 | -2.148138950 |
|    | 1  | 1.379809568  | -0.236425282 | -2.141664995 |
|    | 1  | 1.353344355  | -1.753587568 | -1.247751798 |
|    | Br | 6            | -1.694137150 | 0.042222524  |
| 6  |    | -1.139087367 | 1.476530469  | -0.003108387 |
| 6  |    | -1.153748751 | -0.690127568 | 1.247988869  |
| 6  |    | 0.409406975  | -0.718327952 | 1.256234509  |
| 6  |    | 0.425695050  | 1.463156043  | -0.002962334 |

|                 |    |              |              |              |
|-----------------|----|--------------|--------------|--------------|
|                 | 6  | 0.894401098  | 0.005980761  | -0.000046568 |
|                 | 6  | -1.153489455 | -0.694797557 | -1.246065310 |
|                 | 6  | 0.409675268  | -0.723322856 | -1.253557402 |
|                 | 35 | 2.940018835  | -0.011193157 | 0.000214317  |
|                 | 6  | -3.276304627 | -0.014499457 | -0.000010054 |
|                 | 8  | -3.867731112 | 1.091476760  | 0.000593737  |
|                 | 8  | -3.742842107 | -1.182657705 | 0.000414875  |
|                 | 1  | -1.527670158 | 2.008156221  | -0.876249260 |
|                 | 1  | -1.528085033 | 2.011331814  | 0.867862859  |
|                 | 1  | -1.523001757 | -0.185291943 | 2.148867097  |
|                 | 1  | -1.576342823 | -1.698025544 | 1.252054009  |
|                 | 1  | 0.797084873  | -1.743204581 | 1.255707978  |
|                 | 1  | 0.819126164  | -0.223092132 | 2.143379529  |
|                 | 1  | 0.834940097  | 1.974956699  | 0.875302562  |
|                 | 1  | 0.835003069  | 1.971414915  | -0.883251334 |
|                 | 1  | -1.576411616 | -1.702562181 | -1.246608775 |
|                 | 1  | -1.522181003 | -0.193241773 | -2.149016855 |
|                 | 1  | 0.819848491  | -0.231835199 | -2.142566713 |
|                 | 1  | 0.797147316  | -1.748277274 | -1.248695321 |
| CF <sub>3</sub> | 6  | 1.088864212  | -0.690828198 | -1.245094799 |
|                 | 6  | -0.467918103 | -0.722996883 | -1.255645006 |
|                 | 6  | -1.006813163 | 0.004297448  | 0.000001058  |
|                 | 6  | -0.485467208 | 1.464065699  | 0.000059268  |
|                 | 6  | 1.072929627  | 1.474706395  | -0.000881609 |
|                 | 6  | 1.628976380  | 0.042848540  | -0.000254005 |
|                 | 6  | 1.088996507  | -0.689662950 | 1.245375792  |
|                 | 6  | -0.467747708 | -0.723111186 | 1.255500540  |
|                 | 6  | -2.524238979 | -0.008509170 | 0.000090489  |
|                 | 9  | -3.056070581 | 0.614034525  | 1.087347061  |
|                 | 9  | -3.039470291 | -1.268343672 | -0.000002646 |
|                 | 9  | -3.056172183 | 0.614232967  | -1.087005213 |
|                 | 6  | 3.211192541  | -0.013006118 | -0.000078847 |
|                 | 8  | 3.803735062  | 1.092782770  | 0.000265647  |
|                 | 8  | 3.679589021  | -1.180743141 | 0.000242892  |
|                 | 1  | 1.459949758  | -0.187055162 | -2.146163002 |
|                 | 1  | 1.515720278  | -1.697130705 | -1.248750355 |
|                 | 1  | -0.846815893 | -1.752072004 | -1.259936104 |
|                 | 1  | -0.872575183 | -0.237070878 | -2.151298667 |
|                 | 1  | -0.887842476 | 1.982845673  | 0.878494030  |
|                 | 1  | -0.888916705 | 1.983352625  | -0.877589137 |
|                 | 1  | 1.465309265  | 2.008159396  | 0.869681112  |
|                 | 1  | 1.464140313  | 2.007003144  | -0.872703244 |
|                 | 1  | 1.459465561  | -0.184397633 | 2.145867192  |
|                 | 1  | 1.516610883  | -1.695636838 | 1.250423085  |
|                 | 1  | -0.845789818 | -1.752496404 | 1.259146043  |
|                 | 1  | -0.873077372 | -0.237954075 | 2.151270620  |
| F               | 6  | -0.793461597 | 0.043212085  | -0.000197383 |
|                 | 6  | -0.229686210 | 1.475272085  | -0.000936644 |
|                 | 6  | -0.256446703 | -0.693943465 | 1.248452429  |
|                 | 6  | 1.302747602  | -0.727969033 | 1.249748384  |
|                 | 6  | 1.330813576  | 1.445132795  | -0.000808054 |
|                 | 6  | 1.809112020  | -0.008322371 | 0.000075143  |
|                 | 6  | -0.256256729 | -0.695346843 | -1.247897851 |
|                 | 6  | 1.302938635  | -0.729438558 | -1.248832907 |

|                    |    |              |              |              |
|--------------------|----|--------------|--------------|--------------|
|                    | 9  | 3.227569519  | -0.025942385 | 0.000185212  |
|                    | 6  | -2.375824340 | -0.005518790 | -0.000130178 |
|                    | 8  | -2.964461003 | 1.102385220  | 0.000152403  |
|                    | 8  | -2.850498978 | -1.170862344 | 0.000111656  |
|                    | 1  | -0.618734148 | 2.010813220  | 0.869729797  |
|                    | 1  | -0.618534119 | 2.009871284  | -0.872282019 |
|                    | 1  | -0.688514106 | -1.697864674 | 1.252550906  |
|                    | 1  | -0.625586994 | -0.187733038 | 2.148828467  |
|                    | 1  | 1.691483326  | -1.754490344 | 1.244518525  |
|                    | 1  | 1.723656773  | -0.234057214 | 2.134724835  |
|                    | 1  | 1.750970786  | 1.949640859  | 0.878931131  |
|                    | 1  | 1.751072917  | 1.948593617  | -0.881098641 |
|                    | 1  | -0.688409329 | -1.699233656 | -1.250976604 |
|                    | 1  | -0.625157302 | -0.190126506 | -2.148931657 |
|                    | 1  | 1.724047306  | -0.236613140 | -2.134318427 |
|                    | 1  | 1.691639962  | -1.755968336 | -1.242293864 |
| CHO                | 6  | -0.586814177 | -0.614701818 | 1.306748182  |
|                    | 6  | 0.968226616  | -0.683307002 | 1.347895417  |
|                    | 6  | 1.552142489  | 0.062790585  | 0.115559082  |
|                    | 6  | 0.986800209  | 1.513984576  | 0.120095189  |
|                    | 6  | -0.563046180 | 1.480769179  | -0.047156572 |
|                    | 6  | -1.082893505 | 0.036123227  | 0.000238659  |
|                    | 6  | -0.461645236 | -0.743689830 | -1.180540466 |
|                    | 6  | 1.093594528  | -0.656995251 | -1.163318922 |
|                    | 6  | 3.049037286  | 0.133701924  | 0.252271495  |
|                    | 8  | 3.875744973  | -0.306757701 | -0.523582787 |
|                    | 6  | -2.660570914 | -0.058829164 | -0.080405837 |
|                    | 8  | -3.269754471 | 1.022453526  | -0.266594206 |
|                    | 8  | -3.109552409 | -1.227487484 | 0.042913100  |
|                    | 1  | -0.961476961 | -0.034704502 | 2.160148627  |
|                    | 1  | -1.038920464 | -1.607345731 | 1.375535933  |
|                    | 1  | 1.322123956  | -1.722695787 | 1.328009995  |
|                    | 1  | 1.364800514  | -0.237257678 | 2.271048303  |
|                    | 1  | 1.461896072  | 2.086335280  | -0.688189721 |
|                    | 1  | 1.276116228  | 2.007057120  | 1.058915955  |
|                    | 1  | -0.865718104 | 1.935907651  | -0.994597106 |
|                    | 1  | -1.057995187 | 2.065385682  | 0.733975194  |
|                    | 1  | -0.853157553 | -0.337526183 | -2.121202769 |
|                    | 1  | -0.811630897 | -1.778141921 | -1.118765902 |
|                    | 1  | 1.558741859  | -1.649547616 | -1.202367970 |
|                    | 1  | 1.477789382  | -0.111846374 | -2.034246247 |
|                    | 1  | 3.386941302  | 0.659636904  | 1.181530028  |
| CH <sub>2</sub> Cl | 6  | -1.182508477 | 1.188777639  | -0.857156016 |
|                    | 6  | 0.344754215  | 1.484318370  | -0.917310240 |
|                    | 6  | 1.131597392  | 0.339899543  | -0.219759374 |
|                    | 6  | 0.723832454  | -0.996824413 | -0.882613675 |
|                    | 6  | -0.796110129 | -1.270614372 | -0.672135012 |
|                    | 6  | -1.476618312 | -0.064082306 | -0.008153034 |
|                    | 6  | -0.834964968 | 0.151697654  | 1.378762855  |
|                    | 6  | 0.708977390  | 0.319898231  | 1.265704136  |
|                    | 6  | 2.610397502  | 0.658488589  | -0.406709758 |
|                    | 17 | 3.784241230  | -0.533279960 | 0.374475984  |
|                    | 6  | -3.042957040 | -0.232767609 | 0.153939249  |
|                    | 8  | -3.528140080 | -1.317878367 | -0.246919396 |

|                   |   |              |              |              |
|-------------------|---|--------------|--------------|--------------|
|                   | 8 | -3.610974311 | 0.761490295  | 0.676375309  |
|                   | 1 | -1.575418880 | 1.034811931  | -1.870226171 |
|                   | 1 | -1.741046596 | 2.022170422  | -0.423144416 |
|                   | 1 | 0.584299526  | 2.435422928  | -0.420333956 |
|                   | 1 | 0.687828822  | 1.583552334  | -1.957194864 |
|                   | 1 | 1.335243318  | -1.805950186 | -0.466225265 |
|                   | 1 | 0.971876881  | -0.944057504 | -1.953126550 |
|                   | 1 | -0.954271154 | -2.155335231 | -0.047487837 |
|                   | 1 | -1.299013727 | -1.486591187 | -1.619131037 |
|                   | 1 | -1.074629344 | -0.704359790 | 2.021321622  |
|                   | 1 | -1.309481382 | 1.025563501  | 1.833922495  |
|                   | 1 | 1.045308691  | 1.250656452  | 1.745840942  |
|                   | 1 | 1.236194567  | -0.495393515 | 1.774442972  |
|                   | 1 | 2.868371940  | 1.623320534  | 0.035561240  |
|                   | 1 | 2.887153499  | 0.660302080  | -1.463376710 |
| COOH              | 6 | 1.364450198  | 0.035649084  | -0.018953012 |
|                   | 6 | 0.788826533  | 1.247851813  | -0.767393796 |
|                   | 6 | 0.856624722  | -1.245606513 | -0.714239000 |
|                   | 6 | -0.695928938 | -1.254043186 | -0.817433855 |
|                   | 6 | -0.766511658 | 1.264829406  | -0.677523624 |
|                   | 6 | -1.274791697 | -0.058845568 | -0.031895100 |
|                   | 6 | 0.805566526  | 0.037824002  | 1.417961131  |
|                   | 6 | -0.741878457 | -0.123607339 | 1.426942856  |
|                   | 6 | -2.787682464 | -0.093767563 | -0.049071135 |
|                   | 8 | -3.497238774 | -0.915009377 | -0.598884180 |
|                   | 8 | -3.354709645 | 0.943228283  | 0.640247320  |
|                   | 6 | 2.946770608  | 0.023146213  | 0.023746300  |
|                   | 8 | 3.523933650  | 0.957103311  | -0.584168290 |
|                   | 8 | 3.433096671  | -0.942815525 | 0.666854352  |
|                   | 1 | 1.122968628  | 1.212429746  | -1.808883944 |
|                   | 1 | 1.219187868  | 2.162547917  | -0.349750707 |
|                   | 1 | 1.231810863  | -2.103866393 | -0.149538082 |
|                   | 1 | 1.301540549  | -1.312470705 | -1.714615780 |
|                   | 1 | -1.125568475 | -2.182893195 | -0.424140328 |
|                   | 1 | -1.030911366 | -1.186300032 | -1.859475935 |
|                   | 1 | -1.221590862 | 1.377729901  | -1.671060788 |
|                   | 1 | -1.124704858 | 2.107733092  | -0.075609904 |
|                   | 1 | 1.301977649  | -0.767081582 | 1.966188232  |
|                   | 1 | 1.086559645  | 0.978805399  | 1.908515320  |
|                   | 1 | -1.224602939 | 0.655726813  | 2.026460991  |
|                   | 1 | -1.038846379 | -1.086763908 | 1.864020509  |
|                   | 1 | -4.311148309 | 0.803767324  | 0.542651689  |
| COCH <sub>3</sub> | 6 | -0.888666405 | 1.419535433  | -0.225709443 |
|                   | 6 | 0.662942145  | 1.482648287  | -0.318550416 |
|                   | 6 | 1.270859910  | 0.097037878  | -0.012081646 |
|                   | 6 | 0.763935094  | -0.909388457 | -1.093804082 |
|                   | 6 | -0.794163815 | -0.891378438 | -1.156860843 |
|                   | 6 | -1.377588082 | -0.030540936 | -0.026822936 |
|                   | 6 | -0.807694348 | -0.531284433 | 1.314647740  |
|                   | 6 | 0.740944459  | -0.377504995 | 1.367715751  |
|                   | 6 | 2.795211598  | 0.145684613  | -0.059705481 |
|                   | 8 | 3.408073466  | 1.095033890  | -0.525263454 |
|                   | 6 | 3.581635666  | -1.044717600 | 0.488111507  |

|                   |   |              |              |              |
|-------------------|---|--------------|--------------|--------------|
|                   | 6 | -2.959167643 | -0.059033956 | 0.022155593  |
|                   | 8 | -3.528498862 | -0.714515230 | -0.884286405 |
|                   | 8 | -3.453371039 | 0.596030328  | 0.975813960  |
|                   | 1 | -1.339028523 | 1.828740262  | -1.138525910 |
|                   | 1 | -1.272470196 | 2.018427022  | 0.605324797  |
|                   | 1 | 1.081172621  | 2.217145780  | 0.381159493  |
|                   | 1 | 0.996084094  | 1.798998913  | -1.313000940 |
|                   | 1 | 1.130816855  | -1.916296342 | -0.853205179 |
|                   | 1 | 1.204906433  | -0.642217976 | -2.063323478 |
|                   | 1 | -1.204106317 | -1.902909216 | -1.083838087 |
|                   | 1 | -1.142500560 | -0.499362344 | -2.117126517 |
|                   | 1 | -1.084485800 | -1.585227180 | 1.449019602  |
|                   | 1 | -1.301099744 | 0.029135441  | 2.112842827  |
|                   | 1 | 1.040915991  | 0.354250830  | 2.130972969  |
|                   | 1 | 1.212859438  | -1.327544319 | 1.646974227  |
|                   | 1 | 3.594279298  | -1.001597063 | 1.583534342  |
|                   | 1 | 4.609298413  | -0.987181746 | 0.123748629  |
|                   | 1 | 3.134234294  | -2.003102049 | 0.210756481  |
| CONH <sub>2</sub> | 6 | 0.842446476  | -0.815782822 | -1.171213188 |
|                   | 6 | -0.710091838 | -0.759778936 | -1.252437133 |
|                   | 6 | -1.280309428 | -0.004034447 | -0.024184988 |
|                   | 6 | -0.749361023 | 1.450691802  | -0.052215507 |
|                   | 6 | 0.806362409  | 1.461862205  | -0.157662011 |
|                   | 6 | 1.370589184  | 0.041806590  | -0.001971185 |
|                   | 6 | 0.817248114  | -0.563432480 | 1.304312908  |
|                   | 6 | -0.731727250 | -0.696521087 | 1.255272465  |
|                   | 6 | -2.806679398 | -0.136143548 | -0.017757072 |
|                   | 8 | -3.379346021 | -1.218998423 | -0.110425533 |
|                   | 7 | -3.533987488 | 1.022035476  | 0.104971833  |
|                   | 6 | 2.952787882  | 0.003540196  | 0.017588793  |
|                   | 8 | 3.534589163  | 1.107734144  | -0.118409760 |
|                   | 8 | 3.434746645  | -1.148890904 | 0.165003287  |
|                   | 1 | 1.282678555  | -0.455305163 | -2.109206321 |
|                   | 1 | 1.206471739  | -1.837365322 | -1.029373048 |
|                   | 1 | -1.159271774 | -1.757400290 | -1.280189305 |
|                   | 1 | -1.039763443 | -0.244271922 | -2.165413412 |
|                   | 1 | -1.066637180 | 1.969764941  | 0.865874741  |
|                   | 1 | -1.199622069 | 1.992762455  | -0.895825644 |
|                   | 1 | 1.254009319  | 2.109099427  | 0.601357026  |
|                   | 1 | 1.130350121  | 1.869191100  | -1.120407939 |
|                   | 1 | 1.115808330  | 0.073760429  | 2.147164205  |
|                   | 1 | 1.303812836  | -1.531296081 | 1.452314260  |
|                   | 1 | -1.054620623 | -1.743118854 | 1.238386948  |
|                   | 1 | -1.198602873 | -0.242214481 | 2.140762219  |
|                   | 1 | -3.093961260 | 1.904112565  | 0.305426820  |
|                   | 1 | -4.530252032 | 0.926032139  | 0.226574648  |
| OH                | 6 | -0.802291977 | 0.043009939  | -0.001778565 |
|                   | 6 | -0.264841042 | -0.671558209 | 1.258490921  |
|                   | 6 | -0.265685609 | -0.716890707 | -1.235653219 |
|                   | 6 | 1.292185224  | -0.756813955 | -1.241803317 |
|                   | 6 | 1.292289472  | -0.710598790 | 1.253253125  |
|                   | 6 | 1.826512426  | -0.015716564 | -0.011109547 |
|                   | 6 | -0.237504275 | 1.473526330  | -0.028477144 |
|                   | 6 | 1.321021151  | 1.438943009  | -0.037205394 |

|                               |   |              |              |              |
|-------------------------------|---|--------------|--------------|--------------|
|                               | 8 | 3.264103916  | -0.068640639 | -0.068428968 |
|                               | 6 | -2.384941006 | -0.002726321 | 0.004278927  |
|                               | 8 | -2.972163707 | 1.106404321  | -0.008482182 |
|                               | 8 | -2.863051063 | -1.166649564 | 0.023606068  |
|                               | 1 | -0.699589257 | -1.674269719 | 1.282818258  |
|                               | 1 | -0.631841340 | -0.148228898 | 2.150367315  |
|                               | 1 | -0.701222827 | -1.719503261 | -1.222321656 |
|                               | 1 | -0.635927646 | -0.226432299 | -2.144660138 |
|                               | 1 | 1.676328219  | -1.784924915 | -1.220247810 |
|                               | 1 | 1.711069234  | -0.285651996 | -2.140082755 |
|                               | 1 | 1.679620230  | -1.737540797 | 1.272529994  |
|                               | 1 | 1.708799593  | -0.203216235 | 2.137714158  |
|                               | 1 | -0.629683355 | 1.993990146  | -0.907144745 |
|                               | 1 | -0.623612633 | 2.024430538  | 0.834168556  |
|                               | 1 | 1.737711721  | 1.969280744  | 0.834082301  |
|                               | 1 | 1.739196063  | 1.930567724  | -0.925232553 |
|                               | 1 | 3.577574760  | 0.405545039  | 0.714469192  |
| OCH <sub>3</sub>              | 6 | 0.730858340  | -0.922743832 | -1.136951078 |
|                               | 6 | -0.814991173 | -1.084724459 | -1.189431173 |
|                               | 6 | -1.476718327 | -0.137250057 | -0.177409319 |
|                               | 6 | -1.021169742 | 1.305407247  | -0.476516704 |
|                               | 6 | 0.526302758  | 1.423130134  | -0.304247813 |
|                               | 6 | 1.144787135  | 0.046361748  | -0.009446343 |
|                               | 6 | 0.539866629  | -0.487678640 | 1.307103789  |
|                               | 6 | -1.017521594 | -0.534598670 | 1.236944411  |
|                               | 8 | -2.899856928 | -0.314538723 | -0.379735477 |
|                               | 6 | -3.769485652 | 0.344209163  | 0.508904469  |
|                               | 6 | 2.722088298  | 0.082386018  | 0.118251536  |
|                               | 8 | 3.262853470  | 1.209003323  | 0.000925531  |
|                               | 8 | 3.243499342  | -1.042914693 | 0.332369351  |
|                               | 1 | 1.105939704  | -0.537849406 | -2.093937441 |
|                               | 1 | 1.238410232  | -1.874495044 | -0.960284195 |
|                               | 1 | -1.129265837 | -2.109660355 | -0.953459396 |
|                               | 1 | -1.219413827 | -0.857725411 | -2.183833543 |
|                               | 1 | -1.538398169 | 2.006624253  | 0.191479612  |
|                               | 1 | -1.337792365 | 1.557214124  | -1.497092180 |
|                               | 1 | 0.784898980  | 2.109532823  | 0.507859344  |
|                               | 1 | 0.995226298  | 1.840544090  | -1.199870782 |
|                               | 1 | 0.860971913  | 0.154587491  | 2.136291200  |
|                               | 1 | 0.969017736  | -1.475708657 | 1.494480161  |
|                               | 1 | -1.407455904 | -1.536253413 | 1.462484517  |
|                               | 1 | -1.455812650 | 0.148262236  | 1.976258475  |
|                               | 1 | -3.693304766 | -0.027954847 | 1.541987578  |
|                               | 1 | -4.787309935 | 0.149027955  | 0.152849673  |
|                               | 1 | -3.621772173 | 1.434466169  | 0.533100040  |
| C <sub>6</sub> H <sub>5</sub> | 6 | 2.191955884  | -0.031094455 | -0.028986213 |
|                               | 6 | 1.624376771  | -0.992124261 | -1.082579174 |
|                               | 6 | 1.631342331  | -0.432326700 | 1.349680861  |
|                               | 6 | 0.076153898  | -0.385608286 | 1.366392279  |
|                               | 6 | 0.066991194  | -0.943500810 | -1.095431302 |
|                               | 6 | -0.475976943 | 0.047405815  | -0.022376789 |
|                               | 6 | 1.676266305  | 1.386434867  | -0.342990467 |
|                               | 6 | 0.120318502  | 1.441458718  | -0.333694940 |
|                               | 6 | -2.007747167 | 0.036856666  | -0.011129127 |

|                 |   |              |              |              |
|-----------------|---|--------------|--------------|--------------|
|                 | 6 | -2.782462130 | 1.183646208  | -0.245402774 |
|                 | 6 | -4.179432387 | 1.142269309  | -0.225706797 |
|                 | 6 | -4.848012916 | -0.052820885 | 0.030441450  |
|                 | 6 | -4.098117953 | -1.207188774 | 0.267064116  |
|                 | 6 | -2.705951038 | -1.158241466 | 0.245784311  |
|                 | 6 | 3.773767225  | -0.020260609 | 0.024983516  |
|                 | 8 | 4.361775226  | -0.781687932 | -0.780835957 |
|                 | 8 | 4.249830424  | 0.765732180  | 0.885021961  |
|                 | 1 | 1.987335213  | -2.003076649 | -0.872357691 |
|                 | 1 | 2.038386530  | -0.730275187 | -2.060931597 |
|                 | 1 | 2.068188205  | 0.239434713  | 2.093634751  |
|                 | 1 | 1.980815220  | -1.443351585 | 1.595704890  |
|                 | 1 | -0.296496954 | 0.318951003  | 2.122456390  |
|                 | 1 | -0.340723472 | -1.364561855 | 1.634221056  |
|                 | 1 | -0.353853418 | -1.940339511 | -0.913385332 |
|                 | 1 | -0.316072279 | -0.631165051 | -2.076562435 |
|                 | 1 | 2.057814214  | 1.696423195  | -1.324188806 |
|                 | 1 | 2.112524262  | 2.069352924  | 0.391028649  |
|                 | 1 | -0.236284521 | 2.161883270  | 0.415312593  |
|                 | 1 | -0.258813184 | 1.790013484  | -1.303978468 |
|                 | 1 | -2.292401664 | 2.128976912  | -0.447139429 |
|                 | 1 | -4.743731130 | 2.053184971  | -0.412054978 |
|                 | 1 | -5.934394228 | -0.086820524 | 0.046345873  |
|                 | 1 | -4.599549380 | -2.150831933 | 0.469227288  |
|                 | 1 | -2.146428119 | -2.069585233 | 0.432883923  |
| NH <sub>2</sub> | 6 | 0.812737936  | 0.042145264  | -0.000186270 |
|                 | 6 | 0.249956344  | 1.472718276  | -0.027208707 |
|                 | 6 | 0.275622499  | -0.715606394 | -1.233955089 |
|                 | 6 | -1.281414880 | -0.741414897 | -1.245438764 |
|                 | 6 | -1.308529393 | 1.450052027  | -0.036123756 |
|                 | 6 | -1.833558950 | 0.000355607  | -0.013810997 |
|                 | 6 | 0.272379172  | -0.670655432 | 1.258394082  |
|                 | 6 | -1.283822107 | -0.699697738 | 1.250517807  |
|                 | 7 | -3.310133341 | 0.019066256  | -0.081312847 |
|                 | 6 | 2.395274779  | -0.009555354 | 0.005517731  |
|                 | 8 | 2.987837408  | 1.096716144  | -0.010387749 |
|                 | 8 | 2.868962502  | -1.175707491 | 0.026598036  |
|                 | 1 | 0.645095113  | 1.991452212  | -0.905817568 |
|                 | 1 | 0.638845000  | 2.022624985  | 0.835124251  |
|                 | 1 | 0.704580986  | -1.721226791 | -1.218237466 |
|                 | 1 | 0.652120999  | -0.228944303 | -2.142598464 |
|                 | 1 | -1.662400273 | -1.774468373 | -1.235122983 |
|                 | 1 | -1.693546059 | -0.270069313 | -2.146328105 |
|                 | 1 | -1.721029937 | 1.949386854  | -0.921961708 |
|                 | 1 | -1.718420564 | 1.985018475  | 0.834689267  |
|                 | 1 | 0.704166640  | -1.674867689 | 1.283433162  |
|                 | 1 | 0.640479629  | -0.148682402 | 2.150921364  |
|                 | 1 | -1.699716265 | -0.198917728 | 2.138076644  |
|                 | 1 | -1.666783978 | -1.731683863 | 1.272598787  |
|                 | 1 | -3.658236190 | 0.473924265  | 0.764340973  |
|                 | 1 | -3.640497639 | -0.945128030 | -0.015843038 |
| H               | 6 | -0.478315378 | 0.041907663  | 0.000066147  |
|                 | 6 | 0.054892085  | -0.697223305 | -1.248330718 |
|                 | 6 | 0.091374623  | 1.471769461  | 0.000440805  |

|                                 |   |              |              |              |
|---------------------------------|---|--------------|--------------|--------------|
|                                 | 6 | 1.650643013  | 1.439152034  | -0.000402704 |
|                                 | 6 | 1.612731168  | -0.741160892 | -1.252022258 |
|                                 | 6 | 2.151028786  | -0.020787141 | -0.000046568 |
|                                 | 6 | 0.054936536  | -0.697854085 | 1.248056604  |
|                                 | 6 | 1.612816894  | -0.740587264 | 1.252298489  |
|                                 | 6 | -2.059917694 | 0.001657912  | 0.000012171  |
|                                 | 8 | -2.543907439 | -1.160678328 | -0.000037042 |
|                                 | 8 | -2.645334842 | 1.112433767  | -0.000030163 |
|                                 | 1 | -0.314301123 | -0.187892320 | -2.147961675 |
|                                 | 1 | -0.385753810 | -1.698054120 | -1.253803998 |
|                                 | 1 | -0.298822159 | 2.007041245  | 0.871601497  |
|                                 | 1 | -0.299859876 | 2.007935025  | -0.869684817 |
|                                 | 1 | 2.057425798  | 1.959960345  | -0.879138039 |
|                                 | 1 | 2.058412184  | 1.960834016  | 0.877355241  |
|                                 | 1 | 2.021513184  | -0.262340680 | -2.153039131 |
|                                 | 1 | 1.980650117  | -1.777195223 | -1.260928312 |
|                                 | 1 | 3.251006250  | -0.039931715 | -0.000075143 |
|                                 | 1 | -0.314989053 | -0.189609500 | 2.147993426  |
|                                 | 1 | -0.384935173 | -1.699027277 | 1.252521802  |
|                                 | 1 | 1.981545485  | -1.776324727 | 1.262215271  |
|                                 | 1 | 2.020912568  | -0.260686471 | 2.153052360  |
| CH <sub>3</sub>                 | 6 | 0.824848687  | 0.042337884  | -0.000048155 |
|                                 | 6 | 0.261398215  | 1.472738914  | -0.000508539 |
|                                 | 6 | 0.286336751  | -0.693605850 | -1.245899148 |
|                                 | 6 | -1.269926971 | -0.727283219 | -1.248500584 |
|                                 | 6 | -1.296242955 | 1.446479551  | 0.000260884  |
|                                 | 6 | -1.830271172 | -0.007011069 | 0.000014288  |
|                                 | 6 | 0.286351568  | -0.692878760 | 1.246242055  |
|                                 | 6 | -1.269887282 | -0.727609192 | 1.248324897  |
|                                 | 6 | -3.362076851 | -0.025340711 | 0.000024342  |
|                                 | 6 | 2.406503920  | -0.006709438 | 0.000043922  |
|                                 | 8 | 2.997399112  | 1.100840552  | 0.000027517  |
|                                 | 8 | 2.883047084  | -1.171862489 | 0.000031751  |
|                                 | 1 | 0.652626364  | 2.006963985  | -0.871738024 |
|                                 | 1 | 0.653593700  | 2.007951429  | 0.869656241  |
|                                 | 1 | 0.719234433  | -1.697697983 | -1.251006238 |
|                                 | 1 | 0.657219622  | -0.188055836 | -2.146795368 |
|                                 | 1 | -1.644855402 | -1.761399282 | -1.259015336 |
|                                 | 1 | -1.676519781 | -0.246328305 | -2.150078913 |
|                                 | 1 | -1.701893830 | 1.971302730  | -0.877333545 |
|                                 | 1 | -1.701019629 | 1.970559765  | 0.878703585  |
|                                 | 1 | 0.719917601  | -1.696679846 | 1.252367282  |
|                                 | 1 | 0.656579847  | -0.186273567 | 2.146820240  |
|                                 | 1 | -1.677106638 | -0.247451748 | 2.150045046  |
|                                 | 1 | -1.644102912 | -1.761989315 | 1.258105151  |
|                                 | 1 | -3.765791995 | 0.481808477  | 0.886020518  |
|                                 | 1 | -3.747858178 | -1.053059021 | 0.000021696  |
|                                 | 1 | -3.765795699 | 0.481814827  | -0.885966542 |
| CH <sub>2</sub> CH <sub>3</sub> | 6 | 1.173554798  | 0.049392346  | -0.007169293 |
|                                 | 6 | 0.539372907  | 1.389463878  | -0.409871592 |
|                                 | 6 | 0.784564539  | -1.005861702 | -1.062543465 |
|                                 | 6 | -0.760663720 | -1.146677356 | -1.164477291 |
|                                 | 6 | -1.011619680 | 1.257976561  | -0.514299960 |
|                                 | 6 | -1.472857979 | -0.183242439 | -0.182646586 |

|                                   |   |              |              |              |
|-----------------------------------|---|--------------|--------------|--------------|
|                                   | 6 | 0.564342665  | -0.393875622 | 1.339222202  |
|                                   | 6 | -0.984336359 | -0.532177155 | 1.243241091  |
|                                   | 6 | -2.999987847 | -0.356451149 | -0.335358673 |
|                                   | 6 | -3.897947133 | 0.507167180  | 0.561149080  |
|                                   | 6 | 2.749678012  | 0.115663859  | 0.124128578  |
|                                   | 8 | 3.279261140  | 1.233354473  | -0.090605729 |
|                                   | 8 | 3.284344946  | -0.980695091 | 0.435725605  |
|                                   | 1 | 0.976078549  | 1.717243145  | -1.358400115 |
|                                   | 1 | 0.827038951  | 2.150628199  | 0.321784747  |
|                                   | 1 | 1.266912248  | -1.947207702 | -0.785146634 |
|                                   | 1 | 1.205534037  | -0.712933520 | -2.033086290 |
|                                   | 1 | -1.081410751 | -2.175450317 | -0.942319686 |
|                                   | 1 | -1.111678631 | -0.934086746 | -2.185106214 |
|                                   | 1 | -1.364358122 | 1.516754819  | -1.523859553 |
|                                   | 1 | -1.503184069 | 1.964304890  | 0.168182055  |
|                                   | 1 | 1.043324277  | -1.334520992 | 1.625088515  |
|                                   | 1 | 0.832315378  | 0.340267850  | 2.109938173  |
|                                   | 1 | -1.475084757 | 0.126591898  | 1.971910755  |
|                                   | 1 | -1.308384927 | -1.554623272 | 1.488670324  |
|                                   | 1 | -3.244932354 | -1.414445807 | -0.158481178 |
|                                   | 1 | -3.264163184 | -0.161130239 | -1.385490815 |
|                                   | 1 | -3.717846948 | 0.314404842  | 1.623694133  |
|                                   | 1 | -4.956648242 | 0.298454910  | 0.364392512  |
|                                   | 1 | -3.736967181 | 1.576203120  | 0.389022538  |
| CH(CH <sub>3</sub> ) <sub>2</sub> | 6 | -1.451670251 | -0.005932606 | 0.048552013  |
|                                   | 6 | -0.784757689 | -0.012154143 | 1.433291396  |
|                                   | 6 | -0.955389306 | 1.242301272  | -0.710284458 |
|                                   | 6 | 0.596480128  | 1.332622833  | -0.659882971 |
|                                   | 6 | 0.754158544  | -0.220675380 | 1.298482963  |
|                                   | 6 | 1.211499452  | -0.004540341 | -0.168790609 |
|                                   | 6 | -0.952181962 | -1.236453335 | -0.734278413 |
|                                   | 6 | 0.568649109  | -1.123440125 | -1.031821022 |
|                                   | 6 | 2.764265841  | -0.003857702 | -0.340910272 |
|                                   | 6 | 3.460120694  | -1.244064491 | 0.251027928  |
|                                   | 6 | 3.462021499  | 1.257751660  | 0.201641403  |
|                                   | 6 | -3.031953328 | -0.001221341 | 0.106484221  |
|                                   | 8 | -3.546623712 | 0.035093448  | 1.251064448  |
|                                   | 8 | -3.585757957 | -0.024027293 | -1.023875425 |
|                                   | 1 | -1.243529493 | -0.791999480 | 2.047683645  |
|                                   | 1 | -1.010508937 | 0.931992263  | 1.941669862  |
|                                   | 1 | -1.398966843 | 2.141548576  | -0.265064884 |
|                                   | 1 | -1.330901419 | 1.188581315  | -1.736597803 |
|                                   | 1 | 0.903138344  | 2.140117152  | 0.016560073  |
|                                   | 1 | 1.012352061  | 1.583407869  | -1.647539918 |
|                                   | 1 | 1.298789885  | 0.459917472  | 1.967980026  |
|                                   | 1 | 1.027263747  | -1.237203179 | 1.611911472  |
|                                   | 1 | -1.544650927 | -1.310868885 | -1.650271531 |
|                                   | 1 | -1.157269897 | -2.141578739 | -0.146527593 |
|                                   | 1 | 1.066029685  | -2.084414896 | -0.849597248 |
|                                   | 1 | 0.745760501  | -0.885863882 | -2.091318542 |
|                                   | 1 | 2.944348564  | -0.021518993 | -1.428057833 |
|                                   | 1 | 3.021974633  | -2.179322836 | -0.107632536 |
|                                   | 1 | 4.523455809  | -1.251114719 | -0.019028685 |
|                                   | 1 | 3.401022709  | -1.248838199 | 1.345083369  |
|                                   | 1 | 3.116835475  | 2.167598385  | -0.295886284 |

|                                  |   |              |              |              |
|----------------------------------|---|--------------|--------------|--------------|
|                                  | 1 | 4.546639593  | 1.188511993  | 0.050856050  |
|                                  | 1 | 3.289814522  | 1.380501732  | 1.277195749  |
| C(CH <sub>3</sub> ) <sub>3</sub> | 6 | -1.686282572 | 0.041281646  | -0.007935013 |
|                                  | 6 | -1.125778030 | -0.735430432 | -1.215583642 |
|                                  | 6 | -1.134141147 | -0.642075098 | 1.260329812  |
|                                  | 6 | 0.402194818  | -0.425139414 | 1.370602942  |
|                                  | 6 | 0.402471578  | -0.968444638 | -1.059712367 |
|                                  | 6 | 0.995810510  | 0.004250352  | -0.000951990 |
|                                  | 6 | -1.113204778 | 1.464890686  | -0.053151092 |
|                                  | 6 | 0.419407896  | 1.416963103  | -0.316686125 |
|                                  | 6 | 2.580173014  | -0.008443552 | 0.001850004  |
|                                  | 6 | 3.151736303  | 0.711385676  | 1.245255669  |
|                                  | 6 | 3.152952352  | 0.701058253  | -1.246816742 |
|                                  | 6 | 3.136246755  | -1.451669722 | 0.009637905  |
|                                  | 6 | -3.265886185 | -0.012276912 | -0.003154426 |
|                                  | 8 | -3.738298591 | -1.179221228 | 0.003089866  |
|                                  | 8 | -3.859829438 | 1.093837420  | 0.005208692  |
|                                  | 1 | -1.672594873 | -1.679481057 | -1.288947188 |
|                                  | 1 | -1.334139984 | -0.170255371 | -2.134384045 |
|                                  | 1 | -1.395764262 | -1.704136483 | 1.221271239  |
|                                  | 1 | -1.633326746 | -0.232668653 | 2.147242523  |
|                                  | 1 | 0.895082679  | -1.336349828 | 1.735645813  |
|                                  | 1 | 0.615266450  | 0.355582769  | 2.111178565  |
|                                  | 1 | 0.591527558  | -2.001019207 | -0.740377710 |
|                                  | 1 | 0.911906282  | -0.848612979 | -2.025135931 |
|                                  | 1 | -1.635375720 | 2.039710531  | -0.823099756 |
|                                  | 1 | -1.333332989 | 1.971549856  | 0.893735393  |
|                                  | 1 | 0.935556801  | 2.185327939  | 0.274518106  |
|                                  | 1 | 0.623241151  | 1.655687131  | -1.368241224 |
|                                  | 1 | 2.911302503  | 0.178409993  | 2.169646830  |
|                                  | 1 | 2.769466066  | 1.732429474  | 1.339660361  |
|                                  | 1 | 4.245236637  | 0.773662959  | 1.175002627  |
|                                  | 1 | 2.924573739  | 1.770665705  | -1.246407159 |
|                                  | 1 | 2.759417520  | 0.276045841  | -2.175455079 |
|                                  | 1 | 4.245012795  | 0.595524963  | -1.272220954 |
|                                  | 1 | 2.740171872  | -2.038496599 | 0.844349927  |
|                                  | 1 | 4.229098318  | -1.432953252 | 0.108445352  |
|                                  | 1 | 2.898493767  | -1.985641846 | -0.914930530 |

**4. Table S4. Cartesian coordinates of the optimized geometries of 4-substituted 4-substituted quinuclidines at B3LYP/6-31G(d,p) level**

| Substituents    | Atomic number followed by Cartesian coordinates in Angstrom unit |              |              |              |
|-----------------|------------------------------------------------------------------|--------------|--------------|--------------|
| NO <sub>2</sub> | 7                                                                | 2.142357688  | -0.016548960 | 0.000218021  |
|                 | 6                                                                | 1.664827609  | 1.374419369  | -0.001860058 |
|                 | 6                                                                | 1.637432632  | -0.703990424 | -1.196731174 |
|                 | 6                                                                | 0.072476116  | -0.710803581 | -1.254352226 |
|                 | 6                                                                | 0.100775457  | 1.467165090  | -0.001682784 |
|                 | 6                                                                | -0.427646656 | 0.030404408  | -0.000247655 |
|                 | 6                                                                | 1.637075438  | -0.700549714 | 1.198972768  |
|                 | 6                                                                | 0.072089287  | -0.708015875 | 1.255709565  |

|    |    |              |              |              |
|----|----|--------------|--------------|--------------|
|    | 7  | -1.954643701 | 0.003946604  | -0.000114302 |
|    | 8  | -2.558851934 | 1.072267626  | 0.000000529  |
|    | 8  | -2.487770200 | -1.103820878 | 0.000048684  |
|    | 1  | 2.079333207  | 1.873706570  | -0.883187833 |
|    | 1  | 2.079713685  | 1.876577356  | 0.877655284  |
|    | 1  | 2.024884572  | -1.727576389 | -1.190223881 |
|    | 1  | 2.052821956  | -0.204802708 | -2.077512837 |
|    | 1  | -0.331730634 | -1.725698868 | -1.259509058 |
|    | 1  | -0.294795649 | -0.202686528 | -2.152479261 |
|    | 1  | -0.271404427 | 2.000702230  | -0.880143476 |
|    | 1  | -0.271121318 | 2.002331567  | 0.875886774  |
|    | 1  | 2.051668879  | -0.198332987 | 2.078414026  |
|    | 1  | 2.025051263  | -1.723948350 | 1.195946933  |
|    | 1  | -0.331618977 | -1.723115425 | 1.262598395  |
|    | 1  | -0.296001115 | -0.198288536 | 2.152585626  |
| CN | 6  | -1.364245936 | -0.314602754 | 1.349308850  |
|    | 6  | 0.195824687  | -0.331433765 | 1.418165923  |
|    | 6  | 0.737557724  | 0.000116948  | 0.000069851  |
|    | 6  | 0.196089805  | 1.394147626  | -0.421905083 |
|    | 6  | -1.364026327 | 1.325861006  | -0.402481632 |
|    | 7  | -1.854823409 | 0.000095252  | 0.000028046  |
|    | 6  | -1.364099883 | -1.011510670 | -0.946953691 |
|    | 6  | 0.196137960  | -1.062325973 | -0.996493678 |
|    | 6  | 2.204045468  | -0.000011642 | 0.000099485  |
|    | 7  | 3.365713886  | -0.000248184 | 0.000131236  |
|    | 1  | -1.774755716 | -1.286898743 | 1.640556895  |
|    | 1  | -1.774093715 | 0.428742053  | 2.040841912  |
|    | 1  | 0.573788479  | -1.309527950 | 1.732592460  |
|    | 1  | 0.574535148  | 0.405486300  | 2.133659072  |
|    | 1  | 0.575061679  | 1.645986253  | -1.417557898 |
|    | 1  | 0.573800650  | 2.154927235  | 0.268682869  |
|    | 1  | -1.773413723 | 1.551992203  | -1.392415628 |
|    | 1  | -1.775115027 | 2.064638484  | 0.293187480  |
|    | 1  | -1.775138311 | -0.778446721 | -1.934599525 |
|    | 1  | -1.773474049 | -1.981870400 | -0.647781746 |
|    | 1  | 0.575198736  | -2.050329002 | -0.716327662 |
|    | 1  | 0.573677351  | -0.845070137 | -2.000809653 |
| CI | 7  | 1.947324121  | -0.000109540 | -0.000098956 |
|    | 6  | 1.450059435  | -0.350111076 | 1.338393511  |
|    | 6  | 1.450021335  | 1.334179143  | -0.366368460 |
|    | 6  | -0.117709129 | 1.393970351  | -0.383876818 |
|    | 6  | -0.117511217 | -0.363843226 | 1.399179043  |
|    | 6  | -0.628838259 | 0.000078318  | 0.000142349  |
|    | 6  | 1.450035622  | -0.984303021 | -0.972206559 |
|    | 6  | -0.117453007 | -1.029254512 | -1.014800035 |
|    | 17 | -2.470514259 | -0.000229663 | -0.000112186 |
|    | 1  | 1.857401560  | 0.372962538  | 2.052255736  |
|    | 1  | 1.855135623  | -1.331438005 | 1.605467152  |
|    | 1  | 1.856904134  | 1.590589333  | -1.349775584 |
|    | 1  | 1.855554203  | 2.056428828  | 0.349376578  |
|    | 1  | -0.496397893 | 1.666040484  | -1.373770597 |
|    | 1  | -0.497668448 | 2.135269888  | 0.325722885  |
|    | 1  | -0.495799394 | 0.357556600  | 2.129824654  |
|    | 1  | -0.497923511 | -1.348892387 | 1.686009516  |

|                 |    |              |              |              |
|-----------------|----|--------------|--------------|--------------|
|                 | 1  | 1.856735855  | -1.964256735 | -0.702563762 |
|                 | 1  | 1.855458422  | -0.725858674 | -1.955692001 |
|                 | 1  | -0.496052341 | -2.022673140 | -0.755524880 |
|                 | 1  | -0.497500170 | -0.785354072 | -2.011508030 |
| Br              | 7  | -2.467361421 | 0.000118007  | -0.000181508 |
|                 | 6  | -1.971348239 | -0.022980051 | 1.383833432  |
|                 | 6  | -1.970909022 | -1.186860430 | -0.711813251 |
|                 | 6  | -0.401756130 | -1.240575625 | -0.743371795 |
|                 | 6  | -0.402005902 | -0.023362646 | 1.445824430  |
|                 | 6  | 0.101856037  | -0.000164574 | -0.000010584 |
|                 | 6  | -1.970693118 | 1.209965897  | -0.672273656 |
|                 | 6  | -0.401368243 | 1.263936155  | -0.702471156 |
|                 | 35 | 2.107628314  | -0.000044980 | 0.000075143  |
|                 | 1  | -2.376589001 | -0.912613792 | 1.876500097  |
|                 | 1  | -2.377304449 | 0.849485592  | 1.905951456  |
|                 | 1  | -2.376502745 | -1.169137226 | -1.728486045 |
|                 | 1  | -2.376647740 | -2.075005595 | -0.216793865 |
|                 | 1  | -0.022828177 | -1.239958075 | -1.769732766 |
|                 | 1  | -0.023643639 | -2.145105176 | -0.257727841 |
|                 | 1  | -0.022967351 | -0.912434401 | 1.958555379  |
|                 | 1  | -0.024087619 | 0.849550152  | 1.986360468  |
|                 | 1  | -2.375928588 | 2.081760543  | -0.148646948 |
|                 | 1  | -2.376315946 | 1.225676111  | -1.689040114 |
|                 | 1  | -0.022878978 | 1.296719215  | -1.728550075 |
|                 | 1  | -0.022417536 | 2.152065445  | -0.188062186 |
| CF <sub>3</sub> | 6  | -1.909908644 | -0.958897222 | -0.998120368 |
|                 | 6  | -0.348988691 | -1.005119796 | -1.044292142 |
|                 | 6  | 0.189597329  | 0.000675759  | 0.000218021  |
|                 | 6  | -0.349375520 | -0.401144930 | 1.393244849  |
|                 | 6  | -1.910239380 | -0.385390265 | 1.328991089  |
|                 | 7  | -2.406033482 | -0.000072497 | -0.000292635 |
|                 | 6  | -1.910116610 | 1.343598498  | -0.331135839 |
|                 | 6  | -0.349376578 | 1.407760710  | -0.348502907 |
|                 | 6  | 1.710643246  | 0.000118536  | 0.000071968  |
|                 | 9  | 2.218095653  | 0.871604143  | 0.904687775  |
|                 | 9  | 2.217275957  | 0.347215948  | -1.207606295 |
|                 | 9  | 2.216503358  | -1.219891145 | 0.302700499  |
|                 | 1  | -2.319497126 | -1.944294052 | -0.753054680 |
|                 | 1  | -2.318467877 | -0.674254896 | -1.973282911 |
|                 | 1  | 0.027814615  | -0.739768627 | -2.036987914 |
|                 | 1  | 0.025960907  | -2.007500570 | -0.815357364 |
|                 | 1  | 0.027547380  | -1.393369735 | 1.660013684  |
|                 | 1  | 0.024757558  | 0.298410988  | 2.147217652  |
|                 | 1  | -2.321384172 | 0.318022297  | 2.060461688  |
|                 | 1  | -2.317699511 | -1.373132939 | 1.568251174  |
|                 | 1  | -2.320517909 | 1.625000142  | -1.306441259 |
|                 | 1  | -2.318663143 | 2.044913931  | 0.403824684  |
|                 | 1  | 0.025433846  | 1.711106806  | -1.330978150 |
|                 | 1  | 0.026664183  | 2.135403241  | 0.377497587  |
| F               | 7  | -1.607806644 | 0.000857796  | 0.000029634  |
|                 | 6  | -1.110432419 | -0.737339174 | -1.172770557 |
|                 | 6  | -1.108911563 | 1.384900782  | -0.052094854 |
|                 | 6  | 0.455573985  | 1.441503698  | -0.055290556 |

|                    |    |              |              |              |
|--------------------|----|--------------|--------------|--------------|
|                    | 6  | 0.454635754  | -0.768937406 | -1.220422439 |
|                    | 6  | 0.966225797  | 0.000023813  | -0.000081493 |
|                    | 6  | -1.110130788 | -0.646884261 | 1.225002997  |
|                    | 6  | 0.454878117  | -0.673119811 | 1.275771204  |
|                    | 9  | 2.366698679  | -0.000491076 | -0.000157695 |
|                    | 1  | -1.518550318 | -0.261869712 | -2.070158332 |
|                    | 1  | -1.519373188 | -1.751838108 | -1.131990041 |
|                    | 1  | -1.516836842 | 1.924227122  | 0.808574899  |
|                    | 1  | -1.517664475 | 1.857868295  | -0.950560034 |
|                    | 1  | 0.843646121  | 1.995648058  | 0.805662307  |
|                    | 1  | 0.842188767  | 1.927254016  | -0.957237193 |
|                    | 1  | 0.842571362  | -0.301111380 | -2.131226445 |
|                    | 1  | 0.840767926  | -1.793111287 | -1.189193573 |
|                    | 1  | -1.517992036 | -1.661939360 | 1.260350979  |
|                    | 1  | -1.519235073 | -0.105710564 | 2.084000550  |
|                    | 1  | 0.841789767  | -0.135738198 | 2.147882299  |
|                    | 1  | 0.842014138  | -1.696148023 | 1.324416881  |
| CHO                | 6  | 1.507946664  | -0.556991864 | -1.196123678 |
|                    | 6  | -0.031236804 | -0.822778545 | -1.252771044 |
|                    | 6  | -0.677534207 | -0.170861809 | -0.000224900 |
|                    | 6  | -0.358454085 | 1.334104529  | -0.002264879 |
|                    | 6  | 1.194634573  | 1.500866272  | -0.000909127 |
|                    | 7  | 1.893598872  | 0.203654923  | 0.000158224  |
|                    | 6  | 1.507409020  | -0.555304846 | 1.197330202  |
|                    | 6  | -0.032087192 | -0.819081184 | 1.254756517  |
|                    | 6  | -2.164716485 | -0.447977117 | -0.000042863 |
|                    | 8  | -3.035918982 | 0.394297377  | 0.000019050  |
|                    | 1  | 1.833636210  | 0.007301059  | -2.076166081 |
|                    | 1  | 2.065787328  | -1.499628527 | -1.192551202 |
|                    | 1  | -0.247952350 | -1.897777255 | -1.269657090 |
|                    | 1  | -0.471682670 | -0.392727308 | -2.159399841 |
|                    | 1  | -0.815684924 | 1.807045583  | 0.872728644  |
|                    | 1  | -0.813745490 | 1.804160508  | -0.879844491 |
|                    | 1  | 1.527252637  | 2.060810416  | 0.879577256  |
|                    | 1  | 1.528856044  | 2.060366965  | -0.881066890 |
|                    | 1  | 1.834135224  | 0.009323574  | 2.076774106  |
|                    | 1  | 2.064052155  | -1.498650607 | 1.194359930  |
|                    | 1  | -0.250052655 | -1.893751804 | 1.275592871  |
|                    | 1  | -0.472202851 | -0.385087047 | 2.159657551  |
|                    | 1  | -2.426004102 | -1.533203765 | 0.000237071  |
| CH <sub>2</sub> Cl | 7  | -2.245438241 | -0.440980864 | -0.000003704 |
|                    | 6  | -1.557042141 | -0.942766312 | -1.198814544 |
|                    | 6  | -2.207200951 | 1.026438760  | 0.000350845  |
|                    | 6  | -0.742971737 | 1.574538329  | -0.000436042 |
|                    | 6  | -0.066189490 | -0.480226237 | -1.255643418 |
|                    | 6  | 0.235257388  | 0.369904951  | 0.000007938  |
|                    | 6  | -1.556857459 | -0.943353698 | 1.198454704  |
|                    | 6  | -0.066449316 | -0.479519256 | 1.256086869  |
|                    | 6  | 1.656781469  | 0.929513596  | 0.000008996  |
|                    | 17 | 2.969827390  | -0.340178949 | 0.000000000  |
|                    | 1  | -2.109011584 | -0.591083049 | -2.077135534 |
|                    | 1  | -1.625797083 | -2.035679259 | -1.193407940 |
|                    | 1  | -2.752216476 | 1.380518136  | 0.881823614  |
|                    | 1  | -2.753357911 | 1.381058956  | -0.880198510 |

|                   |   |              |              |              |
|-------------------|---|--------------|--------------|--------------|
|                   | 1 | -0.559618170 | 2.201617073  | 0.880499083  |
|                   | 1 | -0.560123535 | 2.200428541  | -0.882321569 |
|                   | 1 | 0.125863750  | 0.116919067  | -2.155808315 |
|                   | 1 | 0.612470277  | -1.337579107 | -1.292718635 |
|                   | 1 | -1.624603259 | -2.036324326 | 1.191788129  |
|                   | 1 | -2.109316919 | -0.593172770 | 2.077066212  |
|                   | 1 | 0.124370941  | 0.118583859  | 2.155881342  |
|                   | 1 | 0.612890444  | -1.336273627 | 1.294458040  |
|                   | 1 | 1.838743300  | 1.536867259  | 0.889164890  |
|                   | 1 | 1.838748062  | 1.536849267  | -0.889158539 |
| COOH              | 7 | 2.174770853  | -0.055240813 | 0.000027517  |
|                   | 6 | 1.651094401  | -0.725413107 | 1.198642033  |
|                   | 6 | 1.735063718  | 1.349382935  | -0.001439891 |
|                   | 6 | 0.180130348  | 1.480095536  | 0.001185357  |
|                   | 6 | 0.089694485  | -0.697218014 | 1.254788797  |
|                   | 6 | -0.422756000 | 0.060575978  | -0.000055564 |
|                   | 6 | 1.651019258  | -0.727914527 | -1.197154515 |
|                   | 6 | 0.089811963  | -0.695067966 | -1.256009609 |
|                   | 6 | -1.939385933 | 0.130202475  | -0.000011113 |
|                   | 8 | -2.606260923 | 1.142651905  | 0.000066147  |
|                   | 8 | -2.513093448 | -1.102227525 | -0.000035455 |
|                   | 1 | 2.080167190  | -0.231410269 | 2.076709017  |
|                   | 1 | 2.018726537  | -1.757166393 | 1.196880931  |
|                   | 1 | 2.166356935  | 1.835071339  | -0.883302135 |
|                   | 1 | 2.169619312  | 1.838278682  | 0.877036676  |
|                   | 1 | -0.179731878 | 2.031019324  | -0.873150928 |
|                   | 1 | -0.176948405 | 2.028048523  | 0.878552769  |
|                   | 1 | -0.262049103 | -0.188413030 | 2.159648026  |
|                   | 1 | -0.328508474 | -1.707733301 | 1.270229660  |
|                   | 1 | 2.015466276  | -1.760781203 | -1.190872123 |
|                   | 1 | 2.083049090  | -0.238599671 | -2.076392569 |
|                   | 1 | -0.258818476 | -0.182279866 | -2.159844879 |
|                   | 1 | -0.331279775 | -1.704316932 | -1.275564296 |
|                   | 1 | -3.472648437 | -0.946285869 | -0.000037042 |
| COCH <sub>3</sub> | 6 | 1.793295970  | 1.261063781  | -0.345384465 |
|                   | 6 | 0.243985108  | 1.423981581  | -0.406309700 |
|                   | 6 | -0.412164517 | 0.078131962  | -0.027575426 |
|                   | 6 | 0.090281872  | -0.315607661 | 1.392136752  |
|                   | 6 | 1.649683615  | -0.427065090 | 1.348249966  |
|                   | 7 | 2.192122575  | -0.107542576 | 0.021443320  |
|                   | 6 | 1.644781317  | -1.049608256 | -0.963485718 |
|                   | 6 | 0.082633673  | -1.004529234 | -1.020955954 |
|                   | 6 | -1.940794074 | 0.209530907  | -0.008332425 |
|                   | 8 | -2.478638188 | 1.302452850  | -0.000008996 |
|                   | 6 | -2.781397426 | -1.058423820 | 0.007697412  |
|                   | 1 | 2.230995936  | 1.945037017  | 0.389782966  |
|                   | 1 | 2.251346505  | 1.496683655  | -1.312081759 |
|                   | 1 | -0.086802003 | 1.719009539  | -1.407981377 |
|                   | 1 | -0.110150890 | 2.202847939  | 0.273754504  |
|                   | 1 | -0.356361189 | -1.265908399 | 1.705492235  |
|                   | 1 | -0.231452604 | 0.443728882  | 2.113403755  |
|                   | 1 | 1.972649486  | -1.440382371 | 1.610666318  |
|                   | 1 | 2.105187749  | 0.254579237  | 2.074243051  |
|                   | 1 | 1.993513357  | -2.054488335 | -0.701450373 |

|                   |   |              |              |              |
|-------------------|---|--------------|--------------|--------------|
|                   | 1 | 2.075564407  | -0.804583844 | -1.939983904 |
|                   | 1 | -0.263551966 | -0.764281176 | -2.033322303 |
|                   | 1 | -0.339114773 | -1.981812719 | -0.763032317 |
|                   | 1 | -2.784303138 | -1.510098299 | -0.991395055 |
|                   | 1 | -3.806358723 | -0.801076986 | 0.277865682  |
|                   | 1 | -2.388750553 | -1.810927627 | 0.697760420  |
| CONH <sub>2</sub> | 6 | -1.737823907 | 1.346124261  | -0.025186191 |
|                   | 6 | -0.184187021 | 1.467823916  | -0.054148062 |
|                   | 6 | 0.424663155  | 0.050238500  | -0.004144516 |
|                   | 6 | -0.099744620 | -0.743686126 | -1.230112733 |
|                   | 6 | -1.663043753 | -0.751142763 | -1.181218342 |
|                   | 7 | -2.183505453 | -0.057168077 | 0.003947662  |
|                   | 6 | -1.657743514 | -0.703683501 | 1.213671196  |
|                   | 6 | -0.096180611 | -0.653490510 | 1.277538127  |
|                   | 6 | 1.959084027  | 0.149422192  | -0.002580268 |
|                   | 8 | 2.554902684  | 1.218531159  | -0.000640834 |
|                   | 7 | 2.636276915  | -1.039584052 | 0.006505176  |
|                   | 1 | -2.185496747 | 1.822255724  | -0.904265492 |
|                   | 1 | -2.154748373 | 1.847071491  | 0.855253624  |
|                   | 1 | 0.193067673  | 2.052246211  | 0.789442495  |
|                   | 1 | 0.164648738  | 1.978157163  | -0.956674148 |
|                   | 1 | 0.286752684  | -1.770053447 | -1.219969463 |
|                   | 1 | 0.265422079  | -0.279461680 | -2.152965046 |
|                   | 1 | -2.080268792 | -0.263224935 | -2.068340079 |
|                   | 1 | -2.045041992 | -1.777860928 | -1.168665729 |
|                   | 1 | -2.013047936 | -1.739993004 | 1.223926651  |
|                   | 1 | -2.097104037 | -0.204208442 | 2.083543341  |
|                   | 1 | 0.246760643  | -0.101986214 | 2.160043850  |
|                   | 1 | 0.319873888  | -1.664502695 | 1.358388473  |
|                   | 1 | 2.176579581  | -1.933613139 | -0.024457514 |
|                   | 1 | 3.643834631  | -1.005447886 | -0.006216245 |
| OH                | 7 | 1.618927304  | -0.009698231 | -0.000047626 |
|                   | 6 | 1.118014470  | -0.697641355 | 1.200850818  |
|                   | 6 | 1.127240676  | 1.378152185  | -0.002666524 |
|                   | 6 | -0.433378704 | 1.447405611  | -0.002148460 |
|                   | 6 | -0.444946519 | -0.712194259 | 1.250862831  |
|                   | 6 | -0.978002108 | 0.012823552  | 0.000032809  |
|                   | 6 | 1.117906518  | -0.702222972 | -1.198252558 |
|                   | 6 | -0.445067171 | -0.715953005 | -1.248646108 |
|                   | 8 | -2.398915519 | 0.103711332  | -0.000002117 |
|                   | 1 | 1.531605120  | -0.190088935 | 2.078426197  |
|                   | 1 | 1.520611463  | -1.715848763 | 1.199447440  |
|                   | 1 | 1.540777350  | 1.879500532  | -0.883885817 |
|                   | 1 | 1.541568999  | 1.883220648  | 0.876051348  |
|                   | 1 | -0.817165033 | 1.971946739  | -0.883425433 |
|                   | 1 | -0.816460698 | 1.974353437  | 0.878003483  |
|                   | 1 | -0.828716443 | -0.208802759 | 2.144466459  |
|                   | 1 | -0.829540372 | -1.740702631 | 1.268108188  |
|                   | 1 | 1.519775892  | -1.720706081 | -1.192433725 |
|                   | 1 | 1.532085613  | -0.198683302 | -2.077852040 |
|                   | 1 | -0.828266113 | -0.214776641 | -2.143744132 |
|                   | 1 | -0.830249999 | -1.744291511 | -1.263200069 |
|                   | 1 | -2.747798375 | -0.799140727 | 0.000192091  |

|                  |                               |              |              |              |
|------------------|-------------------------------|--------------|--------------|--------------|
| OCH <sub>3</sub> | 6                             | -1.732197165 | 1.180823047  | -0.037836173 |
|                  | 6                             | -0.213993459 | 1.540740307  | -0.070040313 |
|                  | 6                             | 0.605343847  | 0.241045529  | 0.000290518  |
|                  | 6                             | 0.231322955  | -0.630625819 | -1.216137691 |
|                  | 6                             | -1.313837570 | -0.883185716 | -1.178712159 |
|                  | 7                             | -1.947626281 | -0.274451430 | -0.000178862 |
|                  | 6                             | -1.327289255 | -0.819501351 | 1.216335603  |
|                  | 6                             | 0.206058446  | -0.511055045 | 1.286502390  |
|                  | 8                             | 1.970788370  | 0.662768046  | -0.001676963 |
|                  | 6                             | 2.971315965  | -0.337748967 | 0.001135614  |
|                  | 1                             | -2.248022743 | 1.577201149  | -0.918785057 |
|                  | 1                             | -2.220166852 | 1.615558562  | 0.840908158  |
|                  | 1                             | 0.070719777  | 2.180479088  | 0.771723524  |
|                  | 1                             | 0.057050070  | 2.076765639  | -0.985702166 |
|                  | 1                             | 0.774418624  | -1.581402287 | -1.187274776 |
|                  | 1                             | 0.532251769  | -0.112623206 | -2.133467510 |
|                  | 1                             | -1.532135885 | -1.956181490 | -1.164556138 |
|                  | 1                             | -1.795743415 | -0.470382482 | -2.071146835 |
|                  | 1                             | -1.508206490 | -1.899499727 | 1.230549833  |
|                  | 1                             | -1.848077457 | -0.396849599 | 2.081914534  |
|                  | 1                             | 0.452533333  | 0.112676653  | 2.152627960  |
|                  | 1                             | 0.778797566  | -1.439651048 | 1.381643696  |
|                  | 1                             | 3.928234064  | 0.189604737  | 0.028772955  |
|                  | 1                             | 2.949150847  | -0.964099563 | -0.901391001 |
|                  | 1                             | 2.915928041  | -0.995535338 | 0.879620120  |
|                  | C <sub>6</sub> H <sub>5</sub> | 7            | -3.024694074 | -0.039004597 |
| 6                |                               | -2.505508750 | -0.713673839 | 1.198253087  |
| 6                |                               | -2.505616702 | -0.714521051 | -1.197673638 |
| 6                |                               | -0.945570951 | -0.690768401 | -1.256686956 |
| 6                |                               | -0.945472524 | -0.689932830 | 1.257056851  |
| 6                |                               | -0.393898906 | 0.040920747  | -0.000057680 |
| 6                |                               | -2.563068418 | 1.354955171  | -0.000427575 |
| 6                |                               | -1.004940405 | 1.462989352  | -0.000500073 |
| 6                |                               | 1.137817870  | 0.038441023  | -0.000065089 |
| 6                |                               | 1.897326396  | 1.216881714  | -0.000073026 |
| 6                |                               | 3.294093979  | 1.182237538  | -0.000001058 |
| 6                |                               | 3.969410933  | -0.035978232 | 0.000067735  |
| 6                |                               | 3.231334615  | -1.220942091 | 0.000021167  |
| 6                |                               | 1.838672919  | -1.180431985 | -0.000030163 |
| 1                |                               | -2.879538109 | -1.743427365 | 1.192550144  |
| 1                |                               | -2.937077139 | -0.221117243 | 2.076492054  |
| 1                |                               | -2.937309448 | -0.222585710 | -2.076197303 |
| 1                |                               | -2.879553455 | -1.744306857 | -1.191266889 |
| 1                |                               | -0.590138468 | -0.174963991 | -2.156065496 |
| 1                |                               | -0.545365310 | -1.708644015 | -1.302414749 |
| 1                |                               | -0.545237779 | -1.707785160 | 1.303377852  |
| 1                |                               | -0.589964369 | -0.173584955 | 2.156092484  |
| 1                |                               | -2.986643584 | 1.851178436  | 0.879573023  |
| 1                |                               | -2.986736190 | 1.850419067  | -0.880802831 |
| 1                |                               | -0.659391365 | 2.016118751  | -0.881217706 |
| 1                |                               | -0.659426820 | 2.016541035  | 0.879977314  |
| 1                |                               | 1.403938992  | 2.181995710  | -0.000215375 |
| 1                |                               | 3.851684342  | 2.114795491  | 0.000043922  |
| 1                |                               | 5.055115428  | -0.064144749 | 0.000115361  |
| 1                |                               | 3.740738627  | -2.180646837 | 0.000026459  |

|                 |              |              |              |              |
|-----------------|--------------|--------------|--------------|--------------|
|                 | 1            | 1.290283890  | -2.117871069 | 0.000006350  |
| NH <sub>2</sub> | 7            | -1.632253575 | -0.000004233 | 0.010701022  |
|                 | 6            | -1.137513064 | -1.198636212 | -0.684729960 |
|                 | 6            | -1.137514123 | 1.198966418  | -0.684147336 |
|                 | 6            | 0.423411121  | 1.246595546  | -0.729999486 |
|                 | 6            | 0.423420647  | -1.246670689 | -0.729862429 |
|                 | 6            | 0.979945776  | 0.000003704  | -0.013000297 |
|                 | 6            | -1.128311201 | -0.000334969 | 1.392136223  |
|                 | 6            | 0.433482952  | 0.000076202  | 1.436266960  |
|                 | 7            | 2.442238202  | 0.000008467  | -0.109700560 |
|                 | 1            | -1.555961562 | -1.196738582 | -1.696949727 |
|                 | 1            | -1.543884678 | -2.077148763 | -0.172115959 |
|                 | 1            | -1.543380372 | 2.077207502  | -0.170663367 |
|                 | 1            | -1.556470630 | 1.197964686  | -1.696158078 |
|                 | 1            | 0.803944598  | 2.151466945  | -0.238267877 |
|                 | 1            | 0.799672550  | 1.259697445  | -1.758097216 |
|                 | 1            | 0.800151985  | -1.260229798 | -1.757781297 |
|                 | 1            | 0.803503264  | -2.151462183 | -0.237630219 |
|                 | 1            | -1.536070847 | -0.880904433 | 1.900324185  |
|                 | 1            | -1.536570920 | 0.879621178  | 1.900983011  |
|                 | 1            | 0.814529730  | 0.881806680  | 1.967592139  |
| 1               | 0.814982177  | -0.881274328 | 1.967895358  |              |
| 1               | 2.812066422  | -0.813208375 | 0.381904046  |              |
| 1               | 2.812067481  | 0.813177683  | 0.381981305  |              |
| H               | 7            | 1.293746826  | 0.002934288  | 0.003333287  |
|                 | 6            | 0.795570368  | -0.317614831 | 1.351719252  |
|                 | 6            | 0.796218081  | 1.330437331  | -0.396257449 |
|                 | 6            | -0.765030491 | 1.384651011  | -0.418270694 |
|                 | 6            | -0.765536384 | -0.334283385 | 1.406912968  |
|                 | 6            | -1.294497729 | -0.003199935 | -0.003233273 |
|                 | 6            | 0.803339748  | -1.007251322 | -0.949481042 |
|                 | 6            | -0.757452143 | -1.055501703 | -0.994322993 |
|                 | 1            | 1.206516190  | 0.423973637  | 2.045362673  |
|                 | 1            | 1.210678169  | -1.289692799 | 1.639403818  |
|                 | 1            | 1.212675813  | 1.561190362  | -1.382879325 |
|                 | 1            | 1.206412471  | 2.066259354  | 0.304029263  |
|                 | 1            | -1.136046714 | 1.644007660  | -1.416890605 |
|                 | 1            | -1.142386258 | 2.150902313  | 0.269212575  |
|                 | 1            | -1.141903119 | 0.398986945  | 2.129837884  |
|                 | 1            | -1.138126910 | -1.314875286 | 1.725666059  |
|                 | 1            | -2.389811024 | -0.006008278 | -0.005973882 |
|                 | 1            | 1.219319634  | -1.976479671 | -0.653477810 |
|                 | 1            | 1.218891529  | -0.768344728 | -1.934531261 |
|                 | 1            | -1.129248374 | -0.843454559 | -2.003719070 |
| 1               | -1.128872129 | -2.050429546 | -0.721780305 |              |
| CH <sub>3</sub> | 7            | -1.647871712 | 0.000845625  | -0.000040217 |
|                 | 6            | -1.149033253 | 1.384509720  | -0.007427003 |
|                 | 6            | -1.150262003 | -0.685298825 | 1.202331986  |
|                 | 6            | 0.410385953  | -0.716623472 | 1.251903723  |
|                 | 6            | 0.411049012  | 1.442168873  | -0.006116231 |
|                 | 6            | 0.969944855  | -0.000185212 | 0.000044451  |
|                 | 6            | -1.150189505 | -0.698022363 | -1.195046802 |
|                 | 6            | 0.410398653  | -0.727421334 | -1.245578996 |

|                                   |   |              |              |              |
|-----------------------------------|---|--------------|--------------|--------------|
|                                   | 6 | 2.500080979  | 0.000179920  | -0.000055034 |
|                                   | 1 | -1.561772986 | 1.895343569  | 0.869522888  |
|                                   | 1 | -1.559952087 | 1.885188129  | -0.891051406 |
|                                   | 1 | -1.563457357 | -1.699968154 | 1.205677973  |
|                                   | 1 | -1.560814117 | -0.170158003 | 2.077727683  |
|                                   | 1 | 0.782171600  | -1.748457194 | 1.280093524  |
|                                   | 1 | 0.785282104  | -0.221492429 | 2.156317384  |
|                                   | 1 | 0.783924235  | 1.983326166  | 0.872412725  |
|                                   | 1 | 0.785735080  | 1.976841628  | -0.887829775 |
|                                   | 1 | -1.562312747 | -0.193376184 | -2.075834816 |
|                                   | 1 | -1.561826433 | -1.713273257 | -1.186590021 |
|                                   | 1 | 0.783879784  | -1.758794672 | -1.265960258 |
|                                   | 1 | 0.783889839  | -0.238790704 | -2.154121298 |
|                                   | 1 | 2.894882662  | 0.508222888  | -0.887610696 |
|                                   | 1 | 2.896096594  | -1.021954512 | 0.004073606  |
|                                   | 1 | 2.895130317  | 0.515582685  | 0.883116394  |
| CH <sub>2</sub> CH <sub>3</sub>   | 7 | 1.977203056  | -0.314299006 | -0.000015346 |
|                                   | 6 | 1.333598106  | -0.873147753 | 1.197937169  |
|                                   | 6 | 1.804645235  | 1.145952912  | -0.000093135 |
|                                   | 6 | 0.298199317  | 1.551618075  | -0.000622842 |
|                                   | 6 | -0.194340345 | -0.550126847 | 1.250857010  |
|                                   | 6 | -0.581002223 | 0.275756381  | 0.000012171  |
|                                   | 6 | 1.333543072  | -0.873297510 | -1.197861496 |
|                                   | 6 | -0.194622925 | -0.551197902 | -1.250197655 |
|                                   | 6 | -2.069018484 | 0.682566683  | -0.000014288 |
|                                   | 6 | -3.101316294 | -0.452032731 | 0.000026988  |
|                                   | 1 | 1.849914232  | -0.470006766 | 2.076185131  |
|                                   | 1 | 1.504313333  | -1.955383491 | 1.196621105  |
|                                   | 1 | 2.320040062  | 1.545835226  | -0.880365730 |
|                                   | 1 | 2.319409283  | 1.545804533  | 0.880563643  |
|                                   | 1 | 0.055981661  | 2.159949657  | -0.881014502 |
|                                   | 1 | 0.055666801  | 2.161106967  | 0.878875567  |
|                                   | 1 | -0.443924148 | 0.018071403  | 2.155862821  |
|                                   | 1 | -0.780005677 | -1.475191121 | 1.287410987  |
|                                   | 1 | 1.504927178  | -1.955427942 | -1.196908448 |
|                                   | 1 | 1.849309911  | -0.469589245 | -2.076172431 |
|                                   | 1 | -0.445070875 | 0.015837746  | -2.155696130 |
|                                   | 1 | -0.779788186 | -1.476637892 | -1.285384767 |
|                                   | 1 | -2.246695566 | 1.321165616  | -0.876556183 |
|                                   | 1 | -2.246697683 | 1.321362999  | 0.876378380  |
|                                   | 1 | -4.115941701 | -0.040505343 | 0.000159812  |
|                                   | 1 | -3.009915212 | -1.091521740 | 0.883695843  |
|                                   | 1 | -3.010060207 | -1.091324357 | -0.883803795 |
| CH(CH <sub>3</sub> ) <sub>2</sub> | 7 | -2.264079039 | -0.000626546 | 0.172991218  |
|                                   | 6 | -1.588501729 | -0.061786736 | 1.477255971  |
|                                   | 6 | -1.847133934 | 1.223183157  | -0.525081946 |
|                                   | 6 | -0.295846595 | 1.314302716  | -0.666960188 |
|                                   | 6 | -0.033360921 | -0.150867905 | 1.337804536  |
|                                   | 6 | 0.352211381  | 0.000429163  | -0.155237850 |
|                                   | 6 | -1.859774920 | -1.161848338 | -0.630935917 |
|                                   | 6 | -0.327928495 | -1.160867773 | -0.928961665 |
|                                   | 6 | 1.894078306  | 0.000569395  | -0.404134253 |
|                                   | 6 | 2.612491986  | -1.254114096 | 0.126299792  |
|                                   | 6 | 2.617629238  | 1.251728565  | 0.127413181  |

|                                  |   |              |              |              |
|----------------------------------|---|--------------|--------------|--------------|
|                                  | 1 | -1.979963245 | -0.928062063 | 2.022105333  |
|                                  | 1 | -1.879261873 | 0.829453587  | 2.044401158  |
|                                  | 1 | -2.238240901 | 2.082861232  | 0.030448859  |
|                                  | 1 | -2.333692306 | 1.229482483  | -1.506778770 |
|                                  | 1 | 0.082214036  | 2.164871534  | -0.091225395 |
|                                  | 1 | -0.006833795 | 1.486036080  | -1.711698426 |
|                                  | 1 | 0.326687045  | -1.111907765 | 1.720930452  |
|                                  | 1 | 0.449450875  | 0.629106022  | 1.937335371  |
|                                  | 1 | -2.439989198 | -1.151840538 | -1.560416176 |
|                                  | 1 | -2.150658892 | -2.065147552 | -0.083147504 |
|                                  | 1 | 0.110424475  | -2.121715542 | -0.642185696 |
|                                  | 1 | -0.138647085 | -1.035979826 | -2.002649073 |
|                                  | 1 | 2.014827559  | 0.003501566  | -1.498394485 |
|                                  | 1 | 2.178822763  | -2.182854565 | -0.253924645 |
|                                  | 1 | 3.664943511  | -1.238290638 | -0.176107013 |
|                                  | 1 | 2.590966643  | -1.298282934 | 1.220729362  |
|                                  | 1 | 2.246957509  | 2.175173028  | -0.324717448 |
|                                  | 1 | 3.688052153  | 1.187074218  | -0.095084156 |
|                                  | 1 | 2.519311810  | 1.346532257  | 1.214669224  |
| C(CH <sub>3</sub> ) <sub>3</sub> | 7 | -2.489705930 | 0.000924473  | 0.000151345  |
|                                  | 6 | -1.986021266 | -0.731281682 | -1.168259321 |
|                                  | 6 | -1.985786311 | -0.646509075 | 1.217473863  |
|                                  | 6 | -0.424347765 | -0.678740732 | 1.270420693  |
|                                  | 6 | -0.424361524 | -0.761346359 | -1.222324302 |
|                                  | 6 | 0.162891341  | -0.000180449 | 0.000374657  |
|                                  | 6 | -1.984367058 | 1.378193461  | -0.049080661 |
|                                  | 6 | -0.423166642 | 1.439348359  | -0.047506888 |
|                                  | 6 | 1.751169228  | -0.000523356 | -0.000060855 |
|                                  | 6 | 2.318995466  | 0.671310025  | -1.272308268 |
|                                  | 6 | 2.320596757  | 0.766176688  | 1.216981729  |
|                                  | 6 | 2.321451907  | -1.437353890 | 0.054406830  |
|                                  | 1 | -2.393421600 | -1.747765030 | -1.129304996 |
|                                  | 1 | -2.397713757 | -0.257150509 | -2.066173098 |
|                                  | 1 | -2.396959150 | -1.661538244 | 1.253168456  |
|                                  | 1 | -2.393804196 | -0.107017632 | 2.079564457  |
|                                  | 1 | -0.075172274 | -1.713395497 | 1.340344587  |
|                                  | 1 | -0.070675326 | -0.164373566 | 2.169311860  |
|                                  | 1 | -0.075090252 | -0.305458042 | -2.153877877 |
|                                  | 1 | -0.071910426 | -1.797401856 | -1.225823751 |
|                                  | 1 | -2.395909792 | 1.918447448  | 0.810805910  |
|                                  | 1 | -2.391617106 | 1.853741241  | -0.948338019 |
|                                  | 1 | -0.069121132 | 1.959948703  | -0.942593800 |
|                                  | 1 | -0.074178479 | 2.017728508  | 0.813457088  |
|                                  | 1 | 3.413891770  | 0.659945943  | -1.236778779 |
|                                  | 1 | 2.020699309  | 0.149330645  | -2.185940197 |
|                                  | 1 | 2.009850647  | 1.716432975  | -1.363874983 |
|                                  | 1 | 3.415570320  | 0.744479892  | 1.185970354  |
|                                  | 1 | 2.019924065  | 1.817700567  | 1.223801765  |
|                                  | 1 | 2.016201303  | 0.321623878  | 2.168975833  |
|                                  | 1 | 3.416229675  | -1.397598920 | 0.055087352  |
|                                  | 1 | 2.021220549  | -2.038002347 | -0.809089259 |
|                                  | 1 | 2.017603622  | -1.970710051 | 0.959541230  |

**5. Table S5. Comparison of  $V_{\min}$  values at three different levels of theory**

|                          | B3LYP/6-31G(d,p)          | B3LYP/6-311++G(d,p)       | BPW91/6-311++G(d,p)       |
|--------------------------|---------------------------|---------------------------|---------------------------|
| Acid (Model (i))         | $V_{\min}$ ( in kcal/mol) | $V_{\min}$ ( in kcal/mol) | $V_{\min}$ ( in kcal/mol) |
| X = CN                   | -40.41                    | -38.97                    | -36.83                    |
| X = CHO                  | -43.67                    | -42.11                    | -39.97                    |
| X = CH <sub>3</sub>      | -47.88                    | -47.00                    | -44.99                    |
| Anion (Model (ii))       |                           |                           |                           |
| X = CN                   | -173.95                   | -170.18                   | -165.73                   |
| X = CHO                  | -177.40                   | -173.76                   | -168.36                   |
| X = CH <sub>3</sub>      | -182.04                   | -178.21                   | -173.44                   |
| Qunuclidines (Model iii) |                           |                           |                           |
| X = CN                   | -54.09                    | -53.84                    | -51.52                    |
| X = CHO                  | -58.99                    | -58.73                    | -56.60                    |
| X = CH <sub>3</sub>      | -64.26                    | -65.89                    | -62.88                    |
